# Supplementary material for: Evidence Based Selection of Housekeeping Genes
Source: PLoS One. 2007 Sep 19;2(9):e898. doi: 10.1371/journal.pone.0000898 (PMC1976390; doi:10.1371/journal.pone.0000898)
Supplement: Table S1 — The CVs of all 13,037 unique genes in 13,629 samples. (0.72 MB DOC) [file pone.0000898.s001.doc]

Identifiers	mean	sd	median	minimum	maximum	n	Mean/StdDev	CV	MFC
RPS13	12.82	0.33	12.86	8.72	14.03	13629	38.59	2.59	1.61
RPL27	12.70	0.35	12.75	9.95	14.03	13629	36.61	2.73	1.41
EEF1A1	13.47	0.39	13.51	8.73	14.03	13629	34.54	2.90	1.61
RPS20	12.81	0.37	12.83	8.42	14.03	13629	34.43	2.90	1.67
RPLP1	13.05	0.39	13.07	6.74	14.03	13629	33.34	3.00	2.08
TPT1	13.29	0.40	13.31	4.57	14.03	13629	33.16	3.02	3.07
RPS4X	12.96	0.41	12.99	5.57	14.03	13629	31.98	3.13	2.52
RPL30	13.08	0.42	13.09	7.03	14.03	13629	31.03	3.22	1.99
RPL13A	13.01	0.43	13.07	7.65	14.03	13629	30.42	3.29	1.83
RPL39	13.13	0.44	13.12	1.63	14.03	13629	30.11	3.32	8.59
RPL9	12.95	0.44	13.01	8.35	14.03	13629	29.75	3.36	1.68
SRP14	11.45	0.40	11.46	8.82	13.07	13629	28.87	3.46	1.48
RPS27	12.99	0.46	13.01	5.72	14.03	13629	28.30	3.53	2.45
UBC	12.94	0.46	12.99	6.75	14.03	13629	28.17	3.55	2.08
RPS23	13.36	0.49	13.37	2.82	14.03	13629	27.55	3.63	4.98
RPL24	12.50	0.46	12.59	9.11	14.03	13629	27.42	3.65	1.54
RPL22	11.94	0.44	11.99	7.00	13.34	13629	27.17	3.68	1.91
RPS29	12.86	0.47	12.92	7.25	14.03	13629	27.10	3.69	1.93
RPS16	12.48	0.47	12.56	8.65	14.03	13629	26.79	3.73	1.62
RPL4	12.43	0.47	12.49	8.51	13.90	13629	26.61	3.76	1.63
RPL6	12.22	0.46	12.29	8.28	13.66	13629	26.58	3.76	1.65
OAZ1	11.88	0.45	11.89	9.03	13.61	13629	26.45	3.78	1.51
RPS12	12.90	0.49	12.99	7.06	14.03	13629	26.16	3.82	1.99
RPL37	12.65	0.48	12.67	9.99	14.03	13629	26.16	3.82	1.40
RPL32	12.95	0.50	13.01	2.82	14.03	13629	25.99	3.85	4.98
RPL7A	13.09	0.51	13.14	4.90	14.03	13629	25.55	3.91	2.86
UBA52	12.15	0.48	12.20	3.59	13.90	13629	25.11	3.98	3.87
RPL19	12.55	0.50	12.64	6.39	14.03	13629	24.96	4.01	2.20
RPSA	12.59	0.52	12.70	4.36	14.03	13629	24.04	4.16	3.22
RPS15	12.97	0.54	13.04	1.20	14.03	13629	23.89	4.19	11.67
RPL23A	13.69	0.58	13.82	1.20	14.03	13629	23.68	4.22	11.67
FAU	12.24	0.52	12.28	8.75	14.03	13629	23.32	4.29	1.60
ACTG1	12.99	0.56	13.07	7.83	14.03	13629	23.21	4.31	1.79
RPLP0	12.91	0.56	13.02	7.76	13.90	13629	23.15	4.32	1.79
VAPA	11.10	0.48	11.08	8.91	13.18	13629	22.97	4.35	1.48
RPS24	12.84	0.58	12.95	6.19	14.03	13629	22.27	4.49	2.27
RPS18	13.28	0.60	13.37	0.93	14.03	13629	22.23	4.50	15.15
TXNL1	10.44	0.47	10.42	6.92	13.05	13629	22.04	4.54	1.89
EEF2	12.10	0.55	12.18	7.78	13.61	13629	21.95	4.55	1.75
H3F3A	12.51	0.57	12.57	9.53	14.03	13629	21.95	4.56	1.47
SLC25A3	11.85	0.54	11.86	8.91	13.73	13629	21.92	4.56	1.54
CALM2	12.51	0.58	12.57	9.19	14.03	13629	21.55	4.64	1.53
HNRPK	10.94	0.51	11.00	7.43	13.10	13629	21.52	4.65	1.76
PARK7	11.59	0.54	11.62	4.56	14.03	13629	21.42	4.67	3.08
RPL12	12.61	0.59	12.75	8.37	14.03	13629	21.41	4.67	1.68
HMGN2	11.81	0.56	11.85	8.48	13.90	13629	21.02	4.76	1.64
ATP5A1	11.85	0.57	11.85	7.20	13.82	13629	20.95	4.77	1.92
EIF3S6IP	11.66	0.56	11.68	8.34	14.03	13629	20.94	4.78	1.68
RPS15A	12.68	0.61	12.82	6.46	13.90	13629	20.89	4.79	2.15
CFL1	12.80	0.62	12.91	6.89	14.03	13629	20.74	4.82	2.04
RPS17	12.32	0.60	12.47	7.38	13.56	13629	20.60	4.85	1.84
PSMA1	10.62	0.52	10.63	6.54	12.87	13629	20.60	4.85	1.97
RPS3	12.68	0.62	12.84	7.94	14.03	13629	20.55	4.87	1.77
C1orf77	8.47	0.41	8.46	6.28	10.19	13629	20.55	4.87	1.62
UBE2D3	10.24	0.50	10.26	7.56	11.88	13629	20.52	4.87	1.57
PUM1	9.39	0.46	9.40	4.97	11.58	13629	20.51	4.88	2.33
ACTB	13.00	0.63	13.10	7.33	14.03	13629	20.49	4.88	1.91
PPP2CA	9.27	0.45	9.27	7.42	11.76	13629	20.45	4.89	1.58
WBSCR1	10.58	0.52	10.61	5.93	12.68	13629	20.44	4.89	2.14
SNX3	10.49	0.51	10.46	7.13	12.91	13629	20.43	4.89	1.81
LOC130773	13.25	0.65	13.31	1.20	14.03	13629	20.31	4.92	11.67
RPS10	12.38	0.61	12.56	8.87	13.61	13629	20.15	4.96	1.53
SKP1A	10.54	0.52	10.57	7.33	12.71	13629	20.09	4.98	1.73
STAU	9.98	0.50	9.97	7.49	12.89	13629	20.08	4.98	1.72
ZNF9	10.92	0.55	10.95	7.29	13.43	13629	19.88	5.03	1.84
PTGES3	11.26	0.57	11.28	6.90	13.34	13629	19.78	5.06	1.93
ATP5F1	11.26	0.57	11.28	4.60	13.34	13629	19.75	5.06	2.90
HSPC016	11.80	0.60	11.86	8.64	13.90	13629	19.71	5.07	1.61
RPS7	12.24	0.62	12.40	6.29	13.90	13629	19.69	5.08	2.21
ATP5E	11.51	0.59	11.54	8.34	13.90	13629	19.67	5.08	1.67
RHOA	11.62	0.59	11.71	7.56	14.03	13629	19.63	5.10	1.85
JTB	11.19	0.57	11.17	8.92	13.40	13629	19.57	5.11	1.50
RPS25	11.73	0.60	11.77	7.54	14.03	13629	19.53	5.12	1.86
RPS3A	12.61	0.65	12.84	8.69	13.73	13629	19.53	5.12	1.58
EIF4A2	11.92	0.61	11.98	8.83	14.03	13629	19.52	5.12	1.59
SET	10.65	0.55	10.65	8.18	12.63	13629	19.52	5.12	1.54
PITPNB	9.81	0.51	9.81	6.49	12.01	13629	19.43	5.15	1.85
UBE2Q1	9.32	0.48	9.30	4.70	11.67	13629	19.26	5.19	2.48
KHDRBS1	9.36	0.49	9.37	7.37	11.02	13629	19.21	5.20	1.50
HBXIP	9.88	0.52	9.90	6.94	12.36	13629	19.12	5.23	1.78
RPL13	12.12	0.63	12.27	8.20	13.40	13629	19.09	5.24	1.63
NACA	11.79	0.62	11.96	8.25	13.07	13629	19.07	5.24	1.58
PSMB4	10.51	0.55	10.49	8.46	12.88	13629	19.06	5.25	1.52
RPL3	12.87	0.68	13.01	8.09	14.03	13629	19.05	5.25	1.73
SF3B1	10.23	0.54	10.22	7.09	12.44	13629	19.05	5.25	1.75
CNOT1	9.13	0.48	9.13	7.30	11.51	13629	19.02	5.26	1.58
POLR2B	9.66	0.51	9.67	4.42	12.42	13629	18.95	5.28	2.81
COX7A2L	10.08	0.53	10.08	7.74	12.37	13629	18.90	5.29	1.60
RPS27A	12.40	0.66	12.50	6.80	14.03	13629	18.90	5.29	2.06
CSNK1A1	9.40	0.50	9.43	7.11	11.22	13629	18.80	5.32	1.58
DDX5	11.59	0.62	11.64	5.13	14.03	13629	18.79	5.32	2.73
WIPI-2	8.66	0.46	8.63	6.56	11.21	13629	18.78	5.33	1.71
ANAPC5	9.33	0.50	9.35	7.12	11.46	13629	18.76	5.33	1.61
TNFSF5IP1	10.17	0.54	10.22	5.90	12.19	13629	18.75	5.33	2.07
POLR2C	8.29	0.44	8.29	6.20	10.24	13629	18.73	5.34	1.65
RPL8	12.51	0.67	12.60	6.54	14.03	13629	18.72	5.34	2.15
PSMC1	10.34	0.56	10.33	7.75	12.92	13629	18.57	5.39	1.67
C14orf166	10.81	0.58	10.88	7.33	12.72	13629	18.54	5.39	1.74
RPL17	11.97	0.65	12.14	7.28	13.28	13629	18.50	5.40	1.83
RPS9	11.67	0.63	11.72	8.57	13.51	13629	18.41	5.43	1.58
ZC3H11A	9.56	0.52	9.58	6.74	12.03	13629	18.36	5.45	1.78
STRAP	10.51	0.57	10.51	6.71	12.83	13629	18.35	5.45	1.91
HMGB1	11.33	0.62	11.39	8.60	13.04	13629	18.30	5.46	1.52
C13orf12	10.86	0.59	10.93	7.66	12.94	13629	18.28	5.47	1.69
NHP2L1	9.68	0.53	9.69	7.37	12.01	13629	18.27	5.47	1.63
ZNF207	10.09	0.55	10.11	7.57	12.07	13629	18.21	5.49	1.59
RAC1	11.14	0.61	11.18	8.41	13.16	13629	18.18	5.50	1.56
PTP4A2	10.31	0.57	10.32	7.66	13.05	13629	18.18	5.50	1.71
ATP5L	10.91	0.60	10.99	7.48	12.87	13629	18.16	5.51	1.72
KARS	10.76	0.59	10.78	8.27	13.02	13629	18.15	5.51	1.57
DIABLO	9.22	0.51	9.22	4.18	11.98	13629	18.13	5.52	2.87
RPL15	11.33	0.63	11.40	8.67	13.37	13629	18.09	5.53	1.54
GHITM	10.42	0.58	10.37	6.56	12.57	13629	18.02	5.55	1.92
SMAP	10.04	0.56	10.09	6.93	12.32	13629	17.95	5.57	1.78
C2orf25	10.62	0.59	10.71	5.53	12.96	13629	17.93	5.58	2.35
CHCHD2	11.67	0.65	11.76	6.13	14.03	13629	17.92	5.58	2.29
VDAC2	10.90	0.61	10.90	6.71	13.26	13629	17.84	5.61	1.98
ST13	9.85	0.55	9.87	6.90	12.08	13629	17.82	5.61	1.75
C6orf49	10.79	0.61	10.83	8.12	13.10	13629	17.82	5.61	1.61
EIF3S6	11.56	0.65	11.63	7.22	13.82	13629	17.81	5.61	1.91
GDI2	10.60	0.60	10.64	7.55	12.87	13629	17.80	5.62	1.70
FAM32A	9.01	0.51	9.03	6.60	11.66	13629	17.80	5.62	1.77
HSPCA	11.85	0.67	11.93	7.56	14.03	13629	17.77	5.63	1.85
SRRM1	9.01	0.51	9.00	4.75	11.32	13629	17.75	5.63	2.38
EIF3S12	10.67	0.60	10.67	7.42	13.28	13629	17.68	5.66	1.79
COX7A2	11.17	0.63	11.22	4.92	13.66	13629	17.64	5.67	2.78
TEGT	10.90	0.62	10.91	8.46	13.18	13629	17.63	5.67	1.56
Sep-02	10.35	0.59	10.39	7.31	12.92	13629	17.61	5.68	1.77
ATXN10	9.50	0.54	9.51	6.33	11.41	13629	17.61	5.68	1.80
MAML1	8.59	0.49	8.57	5.96	10.37	13629	17.57	5.69	1.74
UBB	11.88	0.68	11.97	4.74	13.82	13629	17.55	5.70	2.91
CCNI	11.13	0.64	11.15	7.62	13.31	13629	17.53	5.70	1.75
EIF3S5	11.08	0.63	11.15	7.93	13.61	13629	17.51	5.71	1.72
EIF3S3	11.14	0.64	11.16	7.96	14.03	13629	17.49	5.72	1.76
COPB	10.30	0.59	10.34	6.84	12.58	13629	17.48	5.72	1.84
SON	9.31	0.53	9.33	7.09	12.31	13629	17.47	5.72	1.74
EIF1	11.69	0.67	11.72	9.33	13.82	13629	17.45	5.73	1.48
RPL38	11.35	0.65	11.42	7.91	13.66	13629	17.42	5.74	1.73
GAPDH	12.83	0.74	12.98	2.20	14.03	13629	17.40	5.75	6.37
ANXA7	9.45	0.54	9.49	6.26	11.85	13629	17.38	5.76	1.89
PHB2	11.20	0.64	11.26	7.34	13.22	13629	17.37	5.76	1.80
XRCC5	10.14	0.58	10.15	6.86	12.22	13629	17.37	5.76	1.78
NCL	11.06	0.64	11.11	7.37	13.40	13629	17.36	5.76	1.82
NARS	10.65	0.61	10.67	7.69	14.03	13629	17.35	5.76	1.82
TRAPPC3	8.33	0.48	8.35	5.09	10.33	13629	17.34	5.77	2.03
SFRS4	9.32	0.54	9.37	3.89	11.59	13629	17.29	5.79	2.98
MORF4L1	10.61	0.61	10.66	7.33	12.82	13629	17.27	5.79	1.75
EEF1B2	11.88	0.69	11.97	8.87	13.90	13629	17.25	5.80	1.57
HSPA8	11.95	0.69	12.05	8.09	13.61	13629	17.20	5.81	1.68
LARP1	9.23	0.54	9.21	6.76	11.89	13629	17.15	5.83	1.76
C14orf92	7.40	0.43	7.39	5.29	10.01	13629	17.15	5.83	1.89
HSPC117	9.30	0.54	9.31	5.48	11.21	13629	17.14	5.83	2.05
FTHP1	12.35	0.72	12.45	7.63	14.03	13629	17.11	5.84	1.84
MATR3	10.63	0.62	10.68	6.06	12.58	13629	17.10	5.85	2.08
RPS2	12.31	0.72	12.57	5.46	13.61	13629	17.10	5.85	2.49
PSMD1	9.38	0.55	9.40	6.40	11.37	13629	17.10	5.85	1.78
RPS6	12.19	0.72	12.44	8.69	13.66	13629	17.03	5.87	1.57
PSMC2	9.58	0.56	9.61	5.94	11.72	13629	17.02	5.87	1.97
YWHAQ	11.12	0.65	11.19	7.60	13.20	13629	17.02	5.88	1.74
KIAA0174	9.82	0.58	9.82	5.41	12.64	13629	17.02	5.88	2.34
ATF4	11.05	0.65	11.05	8.28	13.90	13629	17.01	5.88	1.68
PPP1CC	10.52	0.62	10.54	6.74	12.94	13629	17.01	5.88	1.92
ATP5C1	10.68	0.63	10.69	7.67	13.22	13629	16.98	5.89	1.72
CUGBP1	8.75	0.52	8.73	6.04	10.97	13629	16.95	5.90	1.82
GORASP2	9.36	0.55	9.34	6.92	11.58	13629	16.94	5.90	1.68
RPL10A	11.81	0.70	11.96	4.25	13.82	13629	16.90	5.92	3.25
H2AFV	9.41	0.56	9.43	5.87	11.35	13629	16.89	5.92	1.93
LDHA	12.09	0.72	12.19	6.33	14.03	13629	16.88	5.92	2.21
UBE2A	9.14	0.54	9.16	5.99	11.63	13629	16.86	5.93	1.94
KCMF1	9.99	0.59	9.96	7.34	13.43	13629	16.84	5.94	1.83
SNW1	8.72	0.52	8.72	6.54	10.99	13629	16.83	5.94	1.68
DNCL2A	10.26	0.61	10.31	7.12	13.12	13629	16.83	5.94	1.84
YME1L1	9.70	0.58	9.79	5.22	11.94	13629	16.78	5.96	2.29
SPG21	9.07	0.54	9.08	6.10	11.77	13629	16.77	5.96	1.93
TOMM7	11.41	0.68	11.49	7.47	14.03	13629	16.77	5.96	1.88
B2M	12.75	0.76	12.92	3.50	14.03	13629	16.75	5.97	4.01
K-ALPHA-1	12.60	0.75	12.72	8.14	14.03	13629	16.75	5.97	1.72
CTBP1	9.31	0.56	9.30	5.08	12.30	13629	16.72	5.98	2.42
MTCH1	11.10	0.66	11.11	6.44	13.37	13629	16.71	5.99	2.08
DAZAP2	10.53	0.63	10.52	7.27	12.68	13629	16.61	6.02	1.74
PSARL	9.04	0.54	9.02	6.04	12.29	13629	16.59	6.03	2.03
KIAA0494	8.53	0.51	8.54	6.13	11.34	13629	16.59	6.03	1.85
PPP2R2A	9.12	0.55	9.13	6.03	11.75	13629	16.58	6.03	1.95
YLPM1	7.64	0.46	7.61	5.72	9.69	13629	16.57	6.03	1.69
SUMO2	10.36	0.63	10.42	7.89	12.70	13629	16.57	6.04	1.61
BECN1	8.47	0.51	8.50	5.56	11.55	13629	16.55	6.04	2.08
SEC11L1	10.43	0.63	10.47	7.40	12.54	13629	16.54	6.05	1.70
HNRPA2B1	11.01	0.67	11.07	7.15	13.56	13629	16.54	6.05	1.90
NCOR1	7.55	0.46	7.54	5.36	9.77	13629	16.53	6.05	1.82
HINT1	11.16	0.68	11.23	5.29	13.01	13629	16.48	6.07	2.46
TNRC15	7.83	0.48	7.86	5.05	9.65	13629	16.47	6.07	1.91
GABARAP	11.20	0.68	11.31	6.97	13.02	13629	16.46	6.07	1.87
C20orf24	10.83	0.66	10.84	7.82	13.26	13629	16.43	6.08	1.69
UBE3B	7.07	0.43	7.10	4.57	9.37	13629	16.43	6.09	2.05
TSG101	9.37	0.57	9.39	2.66	13.10	13629	16.41	6.10	4.94
FLJ13855	9.33	0.57	9.34	5.31	12.60	13629	16.40	6.10	2.37
YTHDF1	9.53	0.58	9.47	6.36	13.02	13629	16.38	6.10	2.05
TAX1BP1	9.88	0.60	9.93	6.59	11.92	13629	16.37	6.11	1.81
BAT3	9.76	0.60	9.76	5.55	12.58	13629	16.37	6.11	2.27
WDR45L	9.61	0.59	9.59	6.38	12.80	13629	16.36	6.11	2.01
YWHAB	10.55	0.65	10.61	7.85	12.92	13629	16.35	6.12	1.65
ATP5B	11.48	0.70	11.47	7.97	13.82	13629	16.35	6.12	1.73
UBE2N	9.25	0.57	9.25	6.43	11.87	13629	16.35	6.12	1.85
ARPC2	10.70	0.66	10.69	8.13	13.34	13629	16.31	6.13	1.64
SOD1	11.43	0.70	11.50	6.76	14.03	13629	16.31	6.13	2.07
EIF4B	10.48	0.64	10.48	7.63	12.76	13629	16.29	6.14	1.67
UBE2L3	8.83	0.54	8.88	6.00	11.97	13629	16.28	6.14	2.00
TMEM113	9.83	0.60	9.83	6.27	13.40	13629	16.27	6.14	2.14
MORF4L2	11.52	0.71	11.64	7.70	13.73	13629	16.27	6.15	1.78
PPP1R11	9.65	0.59	9.70	4.77	12.07	13629	16.24	6.16	2.53
RBBP7	10.25	0.63	10.21	5.35	13.07	13629	16.22	6.17	2.44
UTP14C	7.88	0.49	7.92	4.32	10.45	13629	16.21	6.17	2.42
PSMA6	10.92	0.67	10.95	7.36	13.66	13629	16.20	6.17	1.86
DDX42	8.94	0.55	8.92	5.78	11.46	13629	16.19	6.18	1.98
PRPSAP1	8.74	0.54	8.72	5.74	12.10	13629	16.16	6.19	2.11
MAEA	9.02	0.56	9.06	3.45	11.79	13629	16.16	6.19	3.42
HNRPDL	9.71	0.60	9.64	7.09	12.03	13629	16.13	6.20	1.70
RNPS1	9.53	0.59	9.52	5.68	12.17	13629	16.12	6.20	2.14
COPS6	8.85	0.55	8.85	6.80	11.21	13629	16.12	6.21	1.65
ADD1	8.67	0.54	8.66	6.61	11.59	13629	16.11	6.21	1.75
DNAJA1	10.06	0.62	10.07	7.19	12.79	13629	16.11	6.21	1.78
HDCMA18P	7.38	0.46	7.37	5.35	9.64	13629	16.08	6.22	1.80
RPL34	12.57	0.78	12.78	6.24	13.90	13629	16.06	6.23	2.23
IARS2	8.89	0.55	8.92	4.15	11.44	13629	16.05	6.23	2.76
EP400	7.33	0.46	7.32	3.41	9.30	13629	16.05	6.23	2.73
COPZ1	9.22	0.57	9.25	4.62	12.09	13629	16.04	6.23	2.62
NOL9	8.36	0.52	8.33	6.08	11.70	13629	16.02	6.24	1.92
EIF3S2	9.89	0.62	9.92	7.08	11.94	13629	16.01	6.25	1.69
RPS5	12.02	0.75	12.19	5.42	13.82	13629	16.00	6.25	2.55
HNRPR	9.91	0.62	9.93	6.96	12.08	13629	15.99	6.25	1.74
CS	10.18	0.64	10.14	5.37	12.72	13629	15.98	6.26	2.37
FLJ20259	8.33	0.52	8.30	4.28	11.68	13629	15.97	6.26	2.73
NDUFC2	10.73	0.67	10.80	6.89	13.61	13629	15.95	6.27	1.98
NSFL1C	8.11	0.51	8.11	5.52	10.87	13629	15.95	6.27	1.97
PDCD6IP	9.74	0.61	9.81	5.57	11.66	13629	15.94	6.27	2.09
TUBA6	12.44	0.78	12.57	5.50	14.03	13629	15.93	6.28	2.55
RAB11A	9.52	0.60	9.53	6.32	11.95	13629	15.92	6.28	1.89
RPL35	12.05	0.76	12.27	6.30	14.03	13629	15.86	6.30	2.23
VCP	9.19	0.58	9.16	5.85	12.12	13629	15.84	6.31	2.07
MFAP1	8.77	0.55	8.82	4.59	10.64	13629	15.84	6.31	2.32
UFC1	10.12	0.64	10.10	4.91	12.82	13629	15.84	6.31	2.61
RPS11	11.87	0.75	12.10	7.01	14.03	13629	15.80	6.33	2.00
DDB1	9.58	0.61	9.64	6.18	11.92	13629	15.79	6.33	1.93
PSMD2	9.86	0.63	9.83	6.21	12.65	13629	15.77	6.34	2.04
ARF1	10.50	0.67	10.59	5.85	12.79	13629	15.77	6.34	2.18
SERF2	10.24	0.65	10.31	5.57	12.30	13629	15.77	6.34	2.21
SPCS1	10.71	0.68	10.66	6.69	13.51	13629	15.76	6.34	2.02
COX4I1	10.64	0.68	10.74	7.42	12.42	13629	15.76	6.35	1.68
KIAA0676	8.59	0.55	8.61	6.12	10.87	13629	15.74	6.35	1.78
H3F3B	11.40	0.72	11.41	7.92	13.66	13629	15.73	6.36	1.72
USP14	9.28	0.59	9.31	5.93	12.01	13629	15.72	6.36	2.03
ETF1	9.13	0.58	9.13	5.59	11.96	13629	15.72	6.36	2.14
CTCF	8.78	0.56	8.80	4.19	11.07	13629	15.68	6.38	2.64
CSNK2B	10.29	0.66	10.31	2.87	12.71	13629	15.68	6.38	4.43
ZNF24	8.16	0.52	8.17	5.54	10.94	13629	15.67	6.38	1.98
RTF1	7.91	0.51	7.93	4.72	9.72	13629	15.66	6.39	2.06
METAP1	8.67	0.55	8.69	5.18	10.45	13629	15.66	6.39	2.02
CANX	10.54	0.67	10.60	7.88	12.79	13629	15.65	6.39	1.62
QARS	10.40	0.66	10.43	7.34	12.67	13629	15.64	6.39	1.73
TNPO3	7.97	0.51	7.96	5.04	10.47	13629	15.63	6.40	2.08
TXN2	8.27	0.53	8.26	4.76	10.49	13629	15.62	6.40	2.20
CNOT7	9.62	0.62	9.66	3.69	13.37	13629	15.60	6.41	3.62
C20orf4	8.15	0.52	8.18	3.85	10.18	13629	15.58	6.42	2.65
TARDBP	8.88	0.57	8.88	6.25	11.45	13629	15.57	6.42	1.83
ATP5O	10.15	0.65	10.18	6.70	12.16	13629	15.54	6.43	1.82
DHX15	10.17	0.65	10.22	6.61	12.41	13629	15.54	6.43	1.88
ACTR10	9.60	0.62	9.65	3.54	12.04	13629	15.54	6.44	3.41
DUSP11	8.32	0.54	8.36	4.39	10.42	13629	15.53	6.44	2.37
DHX16	8.13	0.52	8.16	4.64	10.40	13629	15.53	6.44	2.24
GTF3C2	8.42	0.54	8.43	5.40	10.89	13629	15.52	6.44	2.02
EIF3S7	10.44	0.67	10.49	6.52	13.73	13629	15.51	6.45	2.11
VPS26A	9.85	0.64	9.91	5.68	12.20	13629	15.50	6.45	2.15
ZNF313	8.71	0.56	8.68	5.70	11.89	13629	15.49	6.45	2.09
IMMT	9.23	0.60	9.22	6.12	11.43	13629	15.49	6.46	1.87
SARS	9.67	0.62	9.67	5.42	12.23	13629	15.48	6.46	2.26
NONO	10.34	0.67	10.34	7.44	12.31	13629	15.48	6.46	1.66
UQCRFS1	10.95	0.71	10.92	5.62	13.82	13629	15.48	6.46	2.46
SUMO3	9.54	0.62	9.52	6.80	12.03	13629	15.47	6.46	1.77
CSDE1	10.41	0.67	10.35	5.61	13.43	13629	15.46	6.47	2.39
RBM23	8.81	0.57	8.84	3.09	11.14	13629	15.45	6.47	3.61
COX6B1	10.63	0.69	10.66	4.19	13.04	13629	15.44	6.48	3.11
C20orf43	8.87	0.57	8.88	6.80	12.15	13629	15.44	6.48	1.79
TMSB10	12.63	0.82	12.80	7.32	14.03	13629	15.43	6.48	1.92
ERH	10.96	0.71	11.03	7.35	13.90	13629	15.43	6.48	1.89
PRDM4	7.51	0.49	7.46	5.11	10.71	13629	15.43	6.48	2.10
TOMM70A	8.94	0.58	8.97	5.06	11.87	13629	15.42	6.48	2.35
MRPL49	9.44	0.61	9.45	5.16	12.05	13629	15.41	6.49	2.33
PREI3	8.67	0.56	8.71	4.73	11.48	13629	15.40	6.49	2.43
PPP6C	9.15	0.59	9.17	5.73	11.99	13629	15.40	6.49	2.09
EIF2B1	8.69	0.56	8.72	2.93	12.15	13629	15.39	6.50	4.15
TINP1	10.46	0.68	10.49	7.19	13.10	13629	15.38	6.50	1.82
C11orf10	10.99	0.71	11.04	5.07	13.90	13629	15.37	6.51	2.74
GNB1	10.02	0.65	10.05	6.19	12.92	13629	15.34	6.52	2.09
RY1	8.49	0.55	8.47	4.20	10.68	13629	15.33	6.52	2.54
GOLGA7	9.61	0.63	9.62	6.02	12.62	13629	15.32	6.53	2.09
RPL36AL	10.81	0.71	10.91	6.64	14.03	13629	15.32	6.53	2.11
DRG1	9.56	0.62	9.55	5.93	12.76	13629	15.31	6.53	2.15
SF3A1	8.63	0.56	8.56	5.44	10.72	13629	15.31	6.53	1.97
SAP130	7.74	0.51	7.73	2.98	10.85	13629	15.31	6.53	3.64
PSMB1	10.12	0.66	10.22	6.77	11.99	13629	15.29	6.54	1.77
RPL29	11.63	0.76	11.82	5.49	13.14	13629	15.28	6.55	2.39
VPS4A	8.47	0.55	8.44	4.02	11.45	13629	15.28	6.55	2.85
SRP46	8.60	0.56	8.60	5.43	11.72	13629	15.27	6.55	2.16
RPL14	11.05	0.72	11.14	8.60	13.28	13629	15.26	6.55	1.54
MARK3	7.57	0.50	7.54	5.21	10.19	13629	15.23	6.57	1.96
GNG5	10.74	0.71	10.85	5.84	13.37	13629	15.22	6.57	2.29
RPL41	13.57	0.89	13.66	0.93	14.03	13629	15.20	6.58	15.15
TRIP12	9.30	0.61	9.36	3.75	12.47	13629	15.20	6.58	3.32
PSMB7	10.10	0.66	10.11	5.08	12.75	13629	15.20	6.58	2.51
RPS26	11.55	0.76	11.68	7.33	13.61	13629	15.20	6.58	1.86
NDUFS5	11.10	0.73	11.19	5.94	13.90	13629	15.19	6.58	2.34
CAPZB	9.24	0.61	9.25	7.06	11.31	13629	15.19	6.58	1.60
RPS28	11.59	0.76	11.79	6.33	13.56	13629	15.18	6.59	2.14
IGBP1	8.85	0.58	8.84	5.09	11.44	13629	15.16	6.59	2.25
MGC2747	7.99	0.53	7.97	5.38	10.70	13629	15.16	6.60	1.99
DCTN3	9.45	0.62	9.49	5.50	12.54	13629	15.15	6.60	2.28
COX7C	10.88	0.72	10.97	5.70	12.57	13629	15.15	6.60	2.21
FLJ11021	9.04	0.60	9.00	6.25	12.36	13629	15.14	6.60	1.98
NDUFB11	9.74	0.64	9.73	5.86	12.67	13629	15.14	6.60	2.16
PRDX6	10.37	0.69	10.40	6.93	13.37	13629	15.14	6.60	1.93
DEDD	7.33	0.48	7.30	5.26	10.01	13629	15.14	6.60	1.90
DREV1	9.93	0.66	9.92	3.98	12.92	13629	15.12	6.61	3.24
EIF3S8	10.89	0.72	10.92	7.31	13.37	13629	15.12	6.61	1.83
PIK4CB	8.21	0.54	8.24	5.87	10.35	13629	15.10	6.62	1.77
ANKHD1	8.21	0.54	8.23	4.92	10.34	13629	15.09	6.63	2.10
SDHC	8.91	0.59	8.97	6.38	11.54	13629	15.09	6.63	1.81
HNRPC	9.78	0.65	9.84	6.83	11.62	13629	15.09	6.63	1.70
BTF3	10.90	0.72	11.07	6.19	12.67	13629	15.09	6.63	2.05
RCP9	7.01	0.46	7.02	5.07	9.25	13629	15.08	6.63	1.83
COG2	8.24	0.55	8.23	2.41	10.17	13629	15.07	6.63	4.22
C14orf2	10.39	0.69	10.41	6.80	12.24	13629	15.07	6.64	1.80
RPL27A	11.91	0.79	12.17	7.77	13.82	13629	15.07	6.64	1.78
EIF5	9.31	0.62	9.32	6.30	11.63	13629	15.07	6.64	1.85
NAP1L1	10.40	0.69	10.40	5.92	12.37	13629	15.07	6.64	2.09
PABPC1	12.32	0.82	12.53	7.83	14.03	13629	15.06	6.64	1.79
SEC31L1	9.30	0.62	9.32	4.56	11.57	13629	15.06	6.64	2.54
PPIA	12.23	0.81	12.47	7.93	13.90	13629	15.04	6.65	1.75
NCOA4	10.96	0.73	10.94	7.56	13.40	13629	15.03	6.65	1.77
PFDN5	10.93	0.73	11.02	5.10	13.26	13629	15.03	6.65	2.60
FBXL12	8.48	0.56	8.51	4.73	11.21	13629	15.02	6.66	2.37
EDF1	9.66	0.64	9.69	5.90	12.54	13629	15.02	6.66	2.13
DDX24	8.98	0.60	8.95	5.84	11.95	13629	15.01	6.66	2.05
TRMT5	10.95	0.73	11.01	4.53	13.31	13629	15.00	6.67	2.94
CCT4	11.05	0.74	11.05	7.35	13.90	13629	14.98	6.67	1.89
PSMB2	9.37	0.63	9.39	6.26	11.49	13629	14.98	6.68	1.84
ASXL1	7.74	0.52	7.68	4.09	10.97	13629	14.98	6.68	2.68
AG1	10.08	0.67	10.10	5.12	12.50	13629	14.96	6.68	2.44
SFRS8	7.40	0.49	7.34	5.04	10.60	13629	14.96	6.68	2.11
TXNDC14	9.33	0.62	9.37	4.45	11.69	13629	14.95	6.69	2.62
RPL26	11.06	0.74	11.13	4.61	13.20	13629	14.94	6.69	2.86
FLJ14154	8.71	0.58	8.74	6.75	11.25	13629	14.94	6.69	1.67
GTF3A	10.57	0.71	10.56	7.39	13.51	13629	14.94	6.69	1.83
ZA20D2	10.19	0.68	10.20	6.15	12.92	13629	14.92	6.70	2.10
USP9X	9.13	0.61	9.16	2.04	11.63	13629	14.92	6.70	5.71
ERBP	9.09	0.61	9.08	5.13	12.03	13629	14.92	6.70	2.35
RNASEH1	8.06	0.54	8.08	4.36	10.29	13629	14.92	6.70	2.36
HDAC3	8.34	0.56	8.32	5.52	10.29	13629	14.91	6.71	1.87
NDUFB2	10.23	0.69	10.26	6.94	12.53	13629	14.91	6.71	1.81
USP7	8.71	0.58	8.72	6.08	11.14	13629	14.90	6.71	1.83
TDE1	9.39	0.63	9.42	6.30	11.73	13629	14.90	6.71	1.86
UBE4A	9.37	0.63	9.41	3.51	12.82	13629	14.89	6.71	3.65
MRP63	9.53	0.64	9.53	7.13	12.48	13629	14.88	6.72	1.75
MLX	8.02	0.54	8.03	5.35	11.63	13629	14.88	6.72	2.17
NDUFB8	9.56	0.64	9.55	6.81	12.43	13629	14.88	6.72	1.83
TRAPPC4	8.81	0.59	8.81	5.77	11.75	13629	14.88	6.72	2.04
FLJ20719	10.31	0.69	10.34	6.43	12.75	13629	14.86	6.73	1.98
WDR73	7.91	0.53	7.89	4.00	10.21	13629	14.86	6.73	2.56
C20orf116	8.61	0.58	8.64	2.76	11.23	13629	14.84	6.74	4.07
RNF34	8.77	0.59	8.79	2.29	11.40	13629	14.83	6.74	4.97
CDC16	8.71	0.59	8.72	4.84	11.88	13629	14.82	6.75	2.45
ACTR3	10.67	0.72	10.76	7.38	12.91	13629	14.82	6.75	1.75
NCBP2	8.04	0.54	8.04	5.40	10.90	13629	14.82	6.75	2.02
KIAA0157	7.47	0.50	7.43	2.80	10.70	13629	14.82	6.75	3.82
SFRS3	9.93	0.67	9.94	6.68	12.12	13629	14.81	6.75	1.81
FAM96B	9.49	0.64	9.52	6.40	12.27	13629	14.81	6.75	1.92
CUEDC2	9.19	0.62	9.21	5.00	11.74	13629	14.81	6.75	2.35
AQR	7.46	0.50	7.48	4.70	9.45	13629	14.80	6.76	2.01
ANP32B	10.80	0.73	10.82	8.02	13.10	13629	14.79	6.76	1.63
MAT2B	10.01	0.68	10.00	7.05	13.51	13629	14.78	6.77	1.92
ARL10C	9.96	0.67	9.92	5.45	13.16	13629	14.77	6.77	2.41
DNAJB12	7.01	0.47	7.05	4.50	10.27	13629	14.77	6.77	2.28
TMED10	10.15	0.69	10.21	5.00	12.65	13629	14.76	6.78	2.53
TGOLN2	8.80	0.60	8.82	6.57	10.66	13629	14.76	6.78	1.62
GCN1L1	7.90	0.54	7.91	5.38	10.35	13629	14.76	6.78	1.92
PWP1	8.65	0.59	8.68	5.78	11.61	13629	14.75	6.78	2.01
RTN4	11.27	0.76	11.28	7.65	13.82	13629	14.75	6.78	1.81
PEX10	6.92	0.47	6.95	3.98	9.28	13629	14.75	6.78	2.33
ZNF262	7.69	0.52	7.69	4.87	10.28	13629	14.75	6.78	2.11
SRP19	9.36	0.63	9.38	2.39	12.48	13629	14.74	6.78	5.22
TLK2	7.85	0.53	7.79	5.24	10.57	13629	14.73	6.79	2.02
RBMX	9.99	0.68	9.98	6.17	12.13	13629	14.72	6.79	1.97
UQCRC2	9.93	0.67	9.93	6.07	12.63	13629	14.72	6.79	2.08
PEX16	7.57	0.51	7.51	5.63	10.13	13629	14.72	6.79	1.80
TRIM44	8.71	0.59	8.73	4.30	12.14	13629	14.71	6.80	2.83
GAPVD1	7.76	0.53	7.78	5.27	10.45	13629	14.71	6.80	1.98
CASP9	7.57	0.52	7.54	5.70	10.96	13629	14.70	6.80	1.92
PTD004	10.25	0.70	10.29	6.60	12.60	13629	14.70	6.80	1.91
TCEA1	10.18	0.69	10.24	3.05	13.20	13629	14.68	6.81	4.32
ABCF1	9.13	0.62	9.17	5.90	11.43	13629	14.67	6.82	1.94
THAP4	7.96	0.54	7.96	3.50	10.99	13629	14.65	6.82	3.14
TCF20	7.51	0.51	7.47	5.51	9.95	13629	14.65	6.82	1.81
GLTSCR2	11.79	0.81	11.87	6.35	14.03	13629	14.64	6.83	2.21
POLR2G	9.90	0.68	9.94	4.98	12.32	13629	14.61	6.84	2.47
PSMC5	9.81	0.67	9.79	2.87	12.71	13629	14.61	6.85	4.43
CTDSP2	9.18	0.63	9.22	6.64	12.18	13629	14.60	6.85	1.84
SIAHBP1	9.64	0.66	9.63	5.98	12.14	13629	14.59	6.86	2.03
DAD1	10.13	0.69	10.18	4.51	12.63	13629	14.58	6.86	2.80
YT521	9.86	0.68	9.89	5.15	12.35	13629	14.57	6.86	2.40
SEC24C	8.50	0.58	8.50	3.22	11.78	13629	14.57	6.86	3.66
LRRC47	9.40	0.65	9.44	2.08	11.62	13629	14.57	6.86	5.58
PRKAR2A	8.39	0.58	8.39	5.82	11.39	13629	14.56	6.87	1.96
RAF1	9.08	0.62	9.08	5.68	12.23	13629	14.56	6.87	2.15
PGAM1	11.14	0.76	11.14	6.52	13.22	13629	14.56	6.87	2.03
HADHA	8.99	0.62	9.00	4.60	11.01	13629	14.54	6.88	2.40
AMZ2	9.31	0.64	9.35	5.10	12.56	13629	14.54	6.88	2.46
TJAP1	7.64	0.53	7.62	4.94	10.46	13629	14.53	6.88	2.12
IDH3B	8.87	0.61	8.85	6.28	11.56	13629	14.53	6.88	1.84
TMEM9B	9.12	0.63	9.13	3.85	11.90	13629	14.52	6.89	3.09
NIPA2	9.45	0.65	9.44	3.42	11.91	13629	14.51	6.89	3.49
FLJ12529	9.00	0.62	9.05	4.34	11.34	13629	14.50	6.90	2.62
RNF4	9.00	0.62	9.03	3.67	12.23	13629	14.50	6.90	3.34
ARL6IP4	8.58	0.59	8.59	4.10	11.51	13629	14.49	6.90	2.81
ARIH1	7.79	0.54	7.79	5.49	11.30	13629	14.49	6.90	2.06
GCC1	7.69	0.53	7.69	3.51	10.04	13629	14.48	6.90	2.86
SPCS2	10.43	0.72	10.40	7.18	13.09	13629	14.48	6.90	1.82
TI-227H	9.13	0.63	9.17	5.21	11.67	13629	14.47	6.91	2.24
ATP5J2	10.80	0.75	10.91	4.75	12.95	13629	14.47	6.91	2.72
FAM61A	8.69	0.60	8.63	6.28	11.90	13629	14.47	6.91	1.89
COX8A	11.08	0.77	11.15	5.95	13.18	13629	14.45	6.92	2.21
RBMX2	7.15	0.50	7.17	4.86	9.97	13629	14.45	6.92	2.05
NDUFV1	9.72	0.67	9.72	4.79	12.63	13629	14.45	6.92	2.63
ZNF403	8.77	0.61	8.78	4.16	11.57	13629	14.44	6.93	2.78
RPL11	12.09	0.84	12.29	2.38	13.82	13629	14.43	6.93	5.81
ADAR	10.40	0.72	10.39	7.28	13.01	13629	14.43	6.93	1.79
ATP5G3	10.75	0.75	10.77	2.66	13.18	13629	14.42	6.94	4.96
LAPTM4A	11.10	0.77	11.20	5.41	13.18	13629	14.42	6.94	2.44
NCOA6	8.62	0.60	8.61	5.86	11.61	13629	14.42	6.94	1.98
TOR1A	7.99	0.55	8.00	4.40	10.20	13629	14.42	6.94	2.32
ACTR1B	8.57	0.59	8.56	4.36	11.03	13629	14.41	6.94	2.53
ATP6V1G1	10.33	0.72	10.35	6.08	12.83	13629	14.41	6.94	2.11
ZNF410	8.75	0.61	8.75	6.16	11.26	13629	14.41	6.94	1.83
UBE2E1	10.19	0.71	10.22	2.00	12.78	13629	14.40	6.94	6.39
VTI1B	9.36	0.65	9.40	4.42	11.85	13629	14.40	6.95	2.68
FARS2	6.74	0.47	6.74	3.72	9.38	13629	14.39	6.95	2.52
CPSF3L	8.37	0.58	8.36	4.83	10.97	13629	14.39	6.95	2.27
MAP3K7	7.62	0.53	7.64	4.11	9.92	13629	14.39	6.95	2.42
C6orf82	10.51	0.73	10.46	6.68	13.47	13629	14.38	6.95	2.02
ZDHHC6	8.52	0.59	8.54	5.06	10.75	13629	14.36	6.96	2.12
NDUFB4	10.99	0.77	11.08	5.79	13.14	13629	14.35	6.97	2.27
PMPCB	9.45	0.66	9.50	3.34	11.93	13629	14.35	6.97	3.57
FTL	11.83	0.82	11.98	7.84	13.90	13629	14.35	6.97	1.77
ANKRD17	7.49	0.52	7.45	4.55	11.68	13629	14.34	6.98	2.57
GPR107	6.62	0.46	6.64	4.41	8.79	13629	14.34	6.98	1.99
OSBPL9	9.21	0.64	9.25	3.79	11.93	13629	14.34	6.98	3.15
FBXO34	8.59	0.60	8.59	4.59	10.98	13629	14.33	6.98	2.39
EXOC7	7.01	0.49	7.06	4.23	10.19	13629	14.32	6.98	2.41
WDR48	7.60	0.53	7.54	5.47	10.04	13629	14.32	6.98	1.84
MYL6	10.72	0.75	10.84	7.28	13.14	13629	14.32	6.98	1.81
FLJ20643	8.81	0.62	8.86	3.49	11.10	13629	14.32	6.98	3.18
EIF2S1	8.58	0.60	8.56	6.24	10.83	13629	14.32	6.99	1.74
C15orf24	9.39	0.66	9.35	5.35	12.33	13629	14.31	6.99	2.30
IK	8.99	0.63	8.99	4.66	11.88	13629	14.31	6.99	2.55
AURKAIP1	9.62	0.67	9.65	5.43	12.24	13629	14.31	6.99	2.26
SDHA	9.55	0.67	9.46	6.90	12.15	13629	14.29	7.00	1.76
C14orf120	8.49	0.59	8.50	2.54	11.12	13629	14.29	7.00	4.38
OS9	9.64	0.68	9.67	6.06	12.96	13629	14.28	7.00	2.14
PIK3C3	7.23	0.51	7.22	3.57	11.31	13629	14.27	7.01	3.17
SUPT5H	8.37	0.59	8.35	4.68	11.71	13629	14.27	7.01	2.50
STX8	8.37	0.59	8.38	4.50	12.01	13629	14.26	7.01	2.67
NOL7	9.09	0.64	9.10	5.84	11.86	13629	14.25	7.02	2.03
N-PAC	7.18	0.50	7.18	4.21	9.57	13629	14.25	7.02	2.27
SRP9	10.95	0.77	11.03	5.74	13.24	13629	14.25	7.02	2.31
C10orf7	9.15	0.64	9.13	6.12	12.33	13629	14.24	7.02	2.01
RING1	8.58	0.60	8.53	6.15	10.88	13629	14.24	7.02	1.77
SERBP1	9.95	0.70	9.99	7.02	12.37	13629	14.24	7.02	1.76
PNRC2	10.13	0.71	10.17	5.99	12.54	13629	14.24	7.02	2.09
BSDC1	7.83	0.55	7.81	4.80	10.46	13629	14.23	7.03	2.18
KIAA0652	7.88	0.55	7.85	5.53	9.98	13629	14.22	7.03	1.81
MAPRE1	9.64	0.68	9.68	6.65	12.04	13629	14.22	7.03	1.81
HNRPA0	9.07	0.64	9.08	5.98	11.33	13629	14.21	7.04	1.89
UBAP2L	7.90	0.56	7.87	5.63	10.26	13629	14.21	7.04	1.82
WAC	8.94	0.63	8.95	5.27	11.55	13629	14.18	7.05	2.19
OSBP	8.15	0.58	8.15	5.37	10.35	13629	14.17	7.06	1.93
CIAPIN1	8.26	0.58	8.25	5.50	11.10	13629	14.17	7.06	2.02
COPS4	9.07	0.64	9.11	4.02	11.46	13629	14.17	7.06	2.85
ESD	10.03	0.71	10.12	4.86	12.40	13629	14.16	7.06	2.55
HSPC152	10.49	0.74	10.56	5.14	13.05	13629	14.16	7.06	2.54
GOSR1	7.90	0.56	7.88	4.76	11.61	13629	14.16	7.06	2.44
SNRPB2	9.76	0.69	9.74	6.08	13.09	13629	14.15	7.07	2.15
EIF2B4	8.38	0.59	8.43	3.78	10.61	13629	14.14	7.07	2.81
MUS81	7.97	0.56	7.98	3.17	11.43	13629	14.14	7.07	3.61
RPP30	8.25	0.58	8.23	5.29	10.45	13629	14.13	7.08	1.98
PABPN1	9.13	0.65	9.14	6.22	11.88	13629	14.13	7.08	1.91
GABARAPL2	10.33	0.73	10.28	6.44	13.05	13629	14.13	7.08	2.03
NDUFA9	9.35	0.66	9.32	5.01	12.70	13629	14.13	7.08	2.54
DDX46	8.95	0.63	8.99	3.09	11.08	13629	14.12	7.08	3.59
JMJD1B	8.65	0.61	8.69	5.59	12.92	13629	14.12	7.08	2.31
CXorf40A	8.52	0.60	8.46	5.94	11.69	13629	14.12	7.08	1.97
SF3B5	9.79	0.69	9.86	4.15	13.02	13629	14.11	7.09	3.14
RPL36	11.22	0.80	11.33	7.84	14.03	13629	14.10	7.09	1.79
XPNPEP1	8.31	0.59	8.28	4.54	10.89	13629	14.10	7.09	2.40
RFP	8.12	0.58	8.16	3.71	10.44	13629	14.09	7.10	2.81
ARL5	9.33	0.66	9.38	4.90	12.04	13629	14.09	7.10	2.46
TTC19	9.10	0.65	9.10	5.18	11.68	13629	14.08	7.10	2.25
RBPSUH	9.30	0.66	9.29	6.36	12.43	13629	14.08	7.10	1.95
MRPL18	9.21	0.65	9.26	4.33	11.56	13629	14.07	7.11	2.67
GPX4	10.40	0.74	10.42	2.63	13.37	13629	14.07	7.11	5.08
AP3S2	7.74	0.55	7.71	5.55	10.79	13629	14.06	7.11	1.95
SDF2	8.02	0.57	8.06	3.54	11.70	13629	14.06	7.11	3.31
ZNF706	10.10	0.72	10.08	5.58	12.56	13629	14.05	7.12	2.25
C7orf28A	8.90	0.63	8.99	6.29	11.69	13629	14.05	7.12	1.86
FAM21C	8.98	0.64	8.99	5.74	12.34	13629	14.05	7.12	2.15
DNAJC8	7.99	0.57	8.00	5.56	10.25	13629	14.04	7.12	1.84
EIF2C1	7.76	0.55	7.75	3.32	10.86	13629	14.04	7.12	3.27
NDUFB1	10.56	0.75	10.65	6.72	12.88	13629	14.03	7.13	1.92
RAB2	8.31	0.59	8.34	5.91	11.43	13629	14.01	7.14	1.93
RSAFD1	8.01	0.57	8.04	3.97	10.20	13629	14.01	7.14	2.57
SFRS9	10.01	0.72	10.08	5.03	12.48	13629	14.00	7.14	2.48
FAM21B	8.64	0.62	8.61	6.03	11.76	13629	14.00	7.14	1.95
POM121	8.70	0.62	8.69	6.44	11.01	13629	13.99	7.15	1.71
NIT1	8.34	0.60	8.32	2.40	11.26	13629	13.98	7.15	4.69
C14orf133	7.86	0.56	7.88	2.80	10.07	13629	13.96	7.16	3.60
UBAP2	8.50	0.61	8.47	4.63	11.71	13629	13.96	7.16	2.53
FIBP	9.14	0.65	9.15	5.17	11.88	13629	13.96	7.16	2.30
RPP38	7.67	0.55	7.67	4.39	10.71	13629	13.95	7.17	2.44
EIF3S10	9.00	0.65	9.07	5.38	11.18	13629	13.95	7.17	2.08
PSMD7	9.15	0.66	9.17	3.36	11.84	13629	13.94	7.17	3.52
AKAP8	7.80	0.56	7.75	5.33	11.70	13629	13.94	7.18	2.20
WDR26	9.35	0.67	9.37	4.57	11.87	13629	13.93	7.18	2.60
RAB1A	9.83	0.71	9.93	6.13	11.61	13629	13.93	7.18	1.89
APEX1	10.10	0.73	10.10	4.64	13.20	13629	13.93	7.18	2.85
PTD008	9.70	0.70	9.78	2.94	12.17	13629	13.93	7.18	4.13
ZNF263	7.71	0.55	7.69	3.50	9.83	13629	13.93	7.18	2.81
UBE2V1	8.55	0.61	8.55	6.14	11.71	13629	13.92	7.18	1.91
RPS19	11.97	0.86	12.27	5.80	13.51	13629	13.92	7.18	2.33
ZNF434	6.84	0.49	6.87	4.17	9.19	13629	13.92	7.18	2.20
HT007	9.30	0.67	9.37	4.65	12.27	13629	13.92	7.18	2.64
YBX1	11.55	0.83	11.67	6.67	13.82	13629	13.92	7.19	2.07
TEX261	8.14	0.59	8.17	4.84	9.97	13629	13.91	7.19	2.06
NPM1	10.58	0.76	10.66	7.18	12.54	13629	13.91	7.19	1.75
GTF2A2	9.29	0.67	9.31	4.54	12.47	13629	13.90	7.19	2.75
KPNB1	9.29	0.67	9.28	6.70	11.23	13629	13.90	7.19	1.68
POP4	8.68	0.62	8.71	2.80	12.95	13629	13.90	7.20	4.62
PCBP1	10.63	0.77	10.72	5.19	13.20	13629	13.90	7.20	2.54
CRKL	7.96	0.57	7.97	4.74	10.51	13629	13.89	7.20	2.21
GPKOW	7.64	0.55	7.62	2.83	11.02	13629	13.88	7.20	3.89
CDC5L	7.93	0.57	7.95	5.71	11.74	13629	13.88	7.21	2.06
HSBP1	9.51	0.68	9.56	6.88	12.31	13629	13.88	7.21	1.79
LOC440434	8.27	0.60	8.26	4.40	11.57	13629	13.87	7.21	2.63
PTMA	11.36	0.82	11.50	7.54	13.47	13629	13.85	7.22	1.79
CSNK1D	8.46	0.61	8.43	4.18	11.61	13629	13.84	7.22	2.78
ATP6V1F	10.04	0.73	10.10	4.07	12.74	13629	13.84	7.22	3.13
SLC25A6	11.24	0.81	11.36	7.07	13.43	13629	13.83	7.23	1.90
ATG4B	7.59	0.55	7.56	4.50	10.20	13629	13.83	7.23	2.27
SMAD2	8.19	0.59	8.23	4.64	10.84	13629	13.83	7.23	2.33
C10orf61	8.34	0.60	8.35	5.54	11.55	13629	13.83	7.23	2.08
CHERP	7.84	0.57	7.83	5.55	10.72	13629	13.82	7.24	1.93
ASCIZ	7.96	0.58	7.98	4.52	10.26	13629	13.82	7.24	2.27
TMEM59	10.63	0.77	10.65	7.03	13.09	13629	13.82	7.24	1.86
SNF8	8.78	0.64	8.77	4.37	12.36	13629	13.81	7.24	2.83
UQCRH	11.03	0.80	11.08	6.01	13.28	13629	13.80	7.25	2.21
ARF4	10.28	0.74	10.31	6.10	12.74	13629	13.80	7.25	2.09
SH3GLB1	9.23	0.67	9.28	5.98	11.79	13629	13.80	7.25	1.97
MLH1	9.13	0.66	9.18	3.61	11.35	13629	13.80	7.25	3.14
CDIPT	9.92	0.72	9.85	6.92	13.10	13629	13.79	7.25	1.90
CLTA	9.41	0.68	9.50	5.90	11.81	13629	13.78	7.25	2.00
RER1	8.42	0.61	8.43	5.07	10.47	13629	13.78	7.25	2.06
C2orf28	10.04	0.73	10.14	4.45	12.63	13629	13.78	7.26	2.84
PCNP	9.78	0.71	9.86	5.18	12.75	13629	13.78	7.26	2.46
CHD4	8.56	0.62	8.58	4.78	11.72	13629	13.78	7.26	2.45
WIRE	8.37	0.61	8.33	4.94	12.50	13629	13.76	7.27	2.53
MDH2	9.54	0.69	9.52	6.29	12.01	13629	13.76	7.27	1.91
HNRPA3	9.11	0.66	9.13	5.75	11.43	13629	13.74	7.28	1.99
HMGN4	9.20	0.67	9.22	5.69	11.76	13629	13.73	7.28	2.07
EIF2B2	8.34	0.61	8.29	5.03	11.16	13629	13.73	7.28	2.22
SEC3L1	8.79	0.64	8.88	3.78	12.62	13629	13.72	7.29	3.34
ZDHHC3	7.23	0.53	7.20	4.51	10.36	13629	13.71	7.29	2.30
EIF2B5	7.85	0.57	7.85	4.25	11.00	13629	13.71	7.29	2.58
RUFY1	8.78	0.64	8.76	4.57	12.44	13629	13.70	7.30	2.72
PTDSS1	9.97	0.73	9.95	6.92	12.29	13629	13.69	7.30	1.77
TAF10	10.04	0.73	10.14	5.70	12.51	13629	13.69	7.31	2.19
SPAG7	9.11	0.67	9.12	6.38	11.21	13629	13.68	7.31	1.76
SSR2	10.46	0.76	10.54	7.42	12.87	13629	13.68	7.31	1.73
TIMM9	8.27	0.60	8.27	3.42	11.74	13629	13.68	7.31	3.43
STAMBP	8.31	0.61	8.31	2.70	11.50	13629	13.67	7.31	4.26
TAF7	9.52	0.70	9.56	5.60	11.75	13629	13.67	7.32	2.10
DNPEP	7.42	0.54	7.41	3.80	9.68	13629	13.67	7.32	2.55
NDUFAB1	10.82	0.79	10.88	7.49	13.47	13629	13.66	7.32	1.80
C14orf154	8.65	0.63	8.61	5.55	11.44	13629	13.64	7.33	2.06
UQCR	10.48	0.77	10.52	6.27	13.40	13629	13.63	7.34	2.14
ERAL1	7.73	0.57	7.73	3.99	11.12	13629	13.63	7.34	2.79
ALKBH	7.84	0.58	7.84	4.19	10.65	13629	13.62	7.34	2.54
PITPNA	8.02	0.59	8.04	4.64	10.33	13629	13.61	7.35	2.22
MGC2749	7.66	0.56	7.67	5.48	10.47	13629	13.61	7.35	1.91
RIC8A	8.88	0.65	8.90	3.20	11.32	13629	13.60	7.35	3.54
ACP1	8.79	0.65	8.78	5.44	12.17	13629	13.59	7.36	2.24
FNTA	9.46	0.70	9.51	5.91	12.62	13629	13.59	7.36	2.13
TOMM20	10.00	0.74	10.05	5.99	12.94	13629	13.58	7.36	2.16
KPNA1	7.36	0.54	7.31	4.90	10.01	13629	13.57	7.37	2.04
SLC25A5	11.47	0.85	11.56	6.65	14.03	13629	13.56	7.37	2.11
JMJD2A	7.39	0.55	7.35	4.64	9.92	13629	13.55	7.38	2.14
NDP52	9.16	0.68	9.17	2.94	12.45	13629	13.55	7.38	4.23
PCBP2	10.31	0.76	10.38	6.71	12.41	13629	13.55	7.38	1.85
LEREPO4	9.26	0.68	9.33	3.83	11.64	13629	13.54	7.39	3.04
ASH2L	8.92	0.66	8.90	4.37	12.65	13629	13.53	7.39	2.89
RPS14	11.40	0.84	11.64	7.70	13.14	13629	13.52	7.40	1.71
FAM82C	8.38	0.62	8.36	5.55	11.73	13629	13.52	7.40	2.11
SUB1	10.11	0.75	10.14	4.92	12.43	13629	13.52	7.40	2.53
PRPF8	9.55	0.71	9.61	3.09	11.94	13629	13.51	7.40	3.87
FLJ13448	8.47	0.63	8.47	4.36	11.10	13629	13.51	7.40	2.55
DDX48	9.93	0.74	9.92	5.43	14.03	13629	13.50	7.41	2.58
GRINL1A	7.70	0.57	7.68	5.32	10.36	13629	13.50	7.41	1.95
RP1-112K5.2	7.95	0.59	7.94	4.58	10.83	13629	13.49	7.41	2.37
COX6A1	11.54	0.86	11.65	7.01	13.90	13629	13.49	7.41	1.98
EXOSC7	7.62	0.56	7.57	4.08	10.47	13629	13.49	7.41	2.57
SLC25A36	8.98	0.67	9.00	5.73	11.46	13629	13.49	7.42	2.00
DCUN1D1	8.22	0.61	8.21	4.03	11.36	13629	13.49	7.42	2.82
CYCS	11.20	0.83	11.25	7.08	13.82	13629	13.47	7.42	1.95
ZNF638	9.16	0.68	9.19	5.43	11.59	13629	13.47	7.42	2.13
KIAA0586	6.68	0.50	6.70	3.86	9.10	13629	13.47	7.42	2.36
FLJ20758	8.41	0.62	8.41	3.68	10.97	13629	13.47	7.42	2.98
C1orf149	8.72	0.65	8.76	3.79	11.11	13629	13.47	7.43	2.93
PPP1R7	7.92	0.59	7.94	5.35	10.96	13629	13.47	7.43	2.05
ZNF212	7.49	0.56	7.45	2.13	10.25	13629	13.47	7.43	4.80
FLJ20232	7.92	0.59	7.88	5.28	10.79	13629	13.46	7.43	2.04
HDGF	9.99	0.74	10.03	6.61	12.33	13629	13.46	7.43	1.86
MRPS18A	7.78	0.58	7.76	5.42	11.25	13629	13.46	7.43	2.08
NDUFS2	9.79	0.73	9.80	3.70	12.74	13629	13.46	7.43	3.44
AP2A2	8.16	0.61	8.16	5.24	11.72	13629	13.45	7.43	2.24
ACAA1	8.19	0.61	8.17	5.71	11.32	13629	13.45	7.43	1.98
STX18	8.13	0.61	8.15	4.46	12.14	13629	13.44	7.44	2.72
RPS21	11.47	0.85	11.71	7.29	13.20	13629	13.41	7.45	1.81
TM2D3	9.23	0.69	9.23	5.71	13.28	13629	13.41	7.45	2.33
DNAJA3	8.75	0.65	8.77	3.53	10.96	13629	13.41	7.46	3.10
BRE	7.98	0.59	7.97	4.11	12.20	13629	13.41	7.46	2.97
ATP5I	9.97	0.74	9.95	6.46	12.62	13629	13.40	7.46	1.95
TRFP	6.84	0.51	6.88	3.47	9.40	13629	13.39	7.47	2.71
CSNK2A1	7.94	0.59	7.99	4.58	11.44	13629	13.38	7.47	2.50
P53CSV	9.04	0.68	9.01	5.03	12.19	13629	13.38	7.47	2.42
AFTIPHILIN	9.40	0.70	9.44	3.79	11.84	13629	13.37	7.48	3.13
RBM13	7.96	0.60	7.96	3.34	11.73	13629	13.36	7.48	3.52
KIAA0391	7.44	0.56	7.40	5.01	10.34	13629	13.35	7.49	2.06
FN3KRP	8.34	0.62	8.37	2.75	10.56	13629	13.35	7.49	3.83
UBAP1	7.85	0.59	7.81	4.55	11.31	13629	13.35	7.49	2.48
HEAB	8.10	0.61	8.11	3.92	11.09	13629	13.34	7.49	2.83
LYK5	8.21	0.62	8.27	2.58	10.81	13629	13.34	7.50	4.18
NDUFB5	10.02	0.75	10.08	2.80	12.86	13629	13.33	7.50	4.58
GOLPH3	9.75	0.73	9.79	5.01	12.20	13629	13.33	7.50	2.44
BXDC5	9.20	0.69	9.22	2.43	12.01	13629	13.32	7.51	4.94
NKIRAS2	7.29	0.55	7.27	3.64	11.31	13629	13.31	7.52	3.10
PSMB3	10.29	0.77	10.31	3.57	14.03	13629	13.30	7.52	3.93
ADIPOR2	9.03	0.68	9.01	4.52	12.62	13629	13.30	7.52	2.79
RAP1B	10.39	0.78	10.43	6.62	13.24	13629	13.30	7.52	2.00
KIAA0100	8.00	0.60	7.98	4.29	11.67	13629	13.30	7.52	2.72
ARF3	9.08	0.68	9.07	6.37	12.54	13629	13.29	7.52	1.97
SLC4A1AP	7.67	0.58	7.73	3.75	9.74	13629	13.29	7.52	2.59
GNAS	11.33	0.85	11.47	5.46	13.82	13629	13.29	7.53	2.53
GRHPR	8.79	0.66	8.76	5.98	12.65	13629	13.29	7.53	2.12
DHX30	8.07	0.61	8.13	4.57	10.58	13629	13.29	7.53	2.31
TBC1D5	7.97	0.60	8.00	4.52	10.40	13629	13.28	7.53	2.30
LOC552889	8.56	0.64	8.54	4.68	11.49	13629	13.28	7.53	2.46
ZNF672	7.86	0.59	7.87	3.26	10.74	13629	13.28	7.53	3.30
ZDHHC7	9.32	0.70	9.33	4.94	11.92	13629	13.28	7.53	2.41
ACTR1A	8.27	0.62	8.26	5.29	10.32	13629	13.27	7.53	1.95
CYB5R3	10.28	0.77	10.27	7.33	13.24	13629	13.27	7.53	1.81
FLJ20397	8.68	0.65	8.69	5.71	11.26	13629	13.26	7.54	1.97
GLO1	10.47	0.79	10.51	4.03	13.43	13629	13.26	7.54	3.33
NIFUN	10.28	0.78	10.24	5.47	13.10	13629	13.26	7.54	2.40
HAX1	9.63	0.73	9.60	5.84	12.35	13629	13.26	7.54	2.12
COBRA1	8.22	0.62	8.24	3.07	10.82	13629	13.25	7.55	3.52
NOLA3	10.37	0.78	10.45	3.02	12.60	13629	13.25	7.55	4.18
BCS1L	8.13	0.61	8.15	3.90	10.99	13629	13.24	7.55	2.82
MMS19L	7.95	0.60	8.01	2.76	10.08	13629	13.24	7.55	3.65
EIF3S9	9.51	0.72	9.50	5.37	11.87	13629	13.23	7.56	2.21
GARS	10.09	0.76	10.03	5.86	12.86	13629	13.23	7.56	2.19
COX5B	10.15	0.77	10.16	6.47	12.74	13629	13.23	7.56	1.97
PSMA2	9.31	0.70	9.39	5.28	11.30	13629	13.23	7.56	2.14
MRPS35	9.23	0.70	9.29	5.68	12.54	13629	13.23	7.56	2.21
DCTN6	8.83	0.67	8.87	2.56	11.16	13629	13.22	7.56	4.36
FBXO9	8.79	0.66	8.75	5.69	12.33	13629	13.22	7.56	2.17
TMEM41B	8.35	0.63	8.36	3.64	11.31	13629	13.22	7.56	3.10
PMF1	7.96	0.60	7.98	3.54	10.60	13629	13.21	7.57	3.00
HMOX2	7.49	0.57	7.44	4.11	9.56	13629	13.20	7.58	2.33
GNPAT	9.02	0.68	9.05	3.04	11.34	13629	13.19	7.58	3.74
PSCD2	7.54	0.57	7.52	2.58	9.91	13629	13.19	7.58	3.83
PAFAH1B1	8.18	0.62	8.17	5.61	10.99	13629	13.19	7.58	1.96
RPL28	11.46	0.87	11.69	7.04	13.18	13629	13.18	7.59	1.87
PSMD13	8.03	0.61	8.07	5.16	10.28	13629	13.18	7.59	1.99
NDUFA10	9.57	0.73	9.60	4.15	11.76	13629	13.18	7.59	2.84
BRD3	8.68	0.66	8.70	5.23	11.20	13629	13.18	7.59	2.14
MGEA5	8.25	0.63	8.24	5.69	10.97	13629	13.18	7.59	1.93
NDUFS3	9.73	0.74	9.74	2.81	12.08	13629	13.18	7.59	4.30
C20orf111	7.89	0.60	7.82	5.02	11.05	13629	13.18	7.59	2.20
LOC130074	9.16	0.69	9.18	4.48	11.58	13629	13.17	7.59	2.58
UBXD2	8.58	0.65	8.64	5.19	10.68	13629	13.17	7.59	2.06
MYST1	7.22	0.55	7.21	3.95	9.08	13629	13.17	7.60	2.30
TSN	8.25	0.63	8.29	5.23	10.52	13629	13.16	7.60	2.01
LRPPRC	9.22	0.70	9.26	3.45	11.45	13629	13.15	7.61	3.32
STUB1	9.40	0.71	9.41	3.54	11.90	13629	13.15	7.61	3.36
VBP1	9.77	0.74	9.81	4.24	12.51	13629	13.15	7.61	2.95
TBK1	8.33	0.63	8.36	3.63	11.55	13629	13.15	7.61	3.18
XAB1	8.63	0.66	8.63	3.57	11.15	13629	13.15	7.61	3.12
PPP2R5D	7.83	0.60	7.84	5.14	11.17	13629	13.14	7.61	2.17
YWHAZ	10.36	0.79	10.43	6.54	12.64	13629	13.14	7.61	1.93
FTH1	11.53	0.88	11.62	7.11	13.90	13629	13.13	7.62	1.95
PABPC3	11.64	0.89	11.83	7.60	13.73	13629	13.13	7.62	1.81
FBXW2	7.19	0.55	7.19	2.48	9.81	13629	13.12	7.62	3.96
OXSR1	8.34	0.64	8.36	4.08	12.45	13629	13.12	7.62	3.05
LCMT1	8.26	0.63	8.25	3.09	11.34	13629	13.11	7.63	3.67
BLOC1S1	8.83	0.67	8.87	2.81	11.22	13629	13.10	7.63	4.00
RAB22A	7.82	0.60	7.81	4.50	11.27	13629	13.10	7.63	2.50
FBXO7	9.73	0.74	9.66	7.05	13.43	13629	13.10	7.63	1.91
NDUFA6	9.14	0.70	9.13	6.15	12.37	13629	13.10	7.63	2.01
ATP6V0B	9.89	0.76	9.91	4.60	12.70	13629	13.09	7.64	2.76
POLDIP2	8.71	0.67	8.70	4.54	11.69	13629	13.09	7.64	2.58
KBTBD2	8.58	0.66	8.54	4.47	11.52	13629	13.09	7.64	2.58
DDOST	9.99	0.76	10.01	6.94	12.76	13629	13.09	7.64	1.84
MGC23401	8.47	0.65	8.46	4.55	12.01	13629	13.08	7.65	2.64
ABCC10	7.63	0.58	7.60	4.59	10.96	13629	13.08	7.65	2.39
COASY	8.52	0.65	8.50	3.46	12.98	13629	13.08	7.65	3.75
PARP6	8.85	0.68	8.84	5.47	11.49	13629	13.08	7.65	2.10
SART3	7.71	0.59	7.73	4.50	10.00	13629	13.08	7.65	2.22
SUCLG1	9.79	0.75	9.75	4.04	13.10	13629	13.08	7.65	3.24
R3HCC1	7.80	0.60	7.80	4.02	10.88	13629	13.08	7.65	2.71
SAP18	9.08	0.70	9.13	6.24	11.80	13629	13.07	7.65	1.89
SUPT7L	7.19	0.55	7.22	5.04	9.88	13629	13.07	7.65	1.96
VPS35	9.95	0.76	9.98	4.07	12.96	13629	13.06	7.66	3.18
RPL36A	12.48	0.96	12.71	5.15	14.03	13629	13.06	7.66	2.72
TBC1D15	8.05	0.62	8.07	2.80	11.74	13629	13.05	7.66	4.19
EIF2AK1	8.94	0.68	8.95	5.24	11.97	13629	13.05	7.66	2.29
C14orf124	8.52	0.65	8.54	4.61	11.29	13629	13.05	7.67	2.45
DUS1L	8.31	0.64	8.32	3.14	10.61	13629	13.04	7.67	3.38
RAD17	7.71	0.59	7.66	4.59	10.48	13629	13.04	7.67	2.28
PDCD10	9.77	0.75	9.85	5.08	12.89	13629	13.04	7.67	2.54
N4BP1	7.96	0.61	7.91	5.08	11.34	13629	13.04	7.67	2.23
FBXL11	8.03	0.62	8.05	4.79	11.14	13629	13.04	7.67	2.33
RRAGC	9.02	0.69	9.05	6.10	11.69	13629	13.04	7.67	1.92
PMS2L1	8.04	0.62	8.05	4.88	10.72	13629	13.04	7.67	2.19
XPO6	8.99	0.69	8.99	6.28	11.99	13629	13.03	7.67	1.91
HNRPH3	8.90	0.68	8.84	5.72	12.08	13629	13.03	7.67	2.11
EIF4A1	11.00	0.84	11.11	6.29	13.22	13629	13.03	7.68	2.10
USP16	8.71	0.67	8.70	4.71	11.67	13629	13.02	7.68	2.48
SUPT4H1	8.45	0.65	8.42	3.28	11.92	13629	13.01	7.68	3.63
RRAGA	9.52	0.73	9.55	2.54	12.50	13629	13.01	7.68	4.93
PARP2	8.14	0.63	8.14	3.81	11.29	13629	13.01	7.69	2.97
AAMP	8.20	0.63	8.20	4.22	10.46	13629	13.00	7.69	2.48
TM9SF2	10.19	0.78	10.22	5.73	12.68	13629	12.99	7.70	2.22
MRPL16	8.63	0.66	8.63	4.67	11.38	13629	12.99	7.70	2.44
RPN2	11.07	0.85	11.20	7.05	13.90	13629	12.99	7.70	1.97
TRIM26	7.94	0.61	7.95	4.03	10.20	13629	12.98	7.71	2.53
RUTBC3	7.03	0.54	7.05	3.23	9.58	13629	12.98	7.71	2.96
EIF3S4	9.83	0.76	9.90	3.92	12.95	13629	12.97	7.71	3.31
WDR39	7.26	0.56	7.27	3.71	10.16	13629	12.97	7.71	2.74
TCP1	9.00	0.69	9.02	6.10	11.16	13629	12.97	7.71	1.83
OSBPL2	7.48	0.58	7.41	3.87	11.47	13629	12.96	7.71	2.96
VPS11	7.86	0.61	7.85	3.51	11.37	13629	12.96	7.72	3.24
PSMD9	7.92	0.61	7.93	5.00	10.96	13629	12.95	7.72	2.19
FLJ14346	9.33	0.72	9.34	5.23	12.32	13629	12.95	7.72	2.36
ALS4	7.75	0.60	7.73	3.96	10.78	13629	12.94	7.73	2.72
ANGEL1	7.11	0.55	7.12	4.14	10.06	13629	12.94	7.73	2.43
COPS8	8.40	0.65	8.39	5.37	10.96	13629	12.94	7.73	2.04
ABHD10	8.57	0.66	8.56	4.20	11.14	13629	12.93	7.73	2.65
GSTO1	10.36	0.80	10.35	5.09	13.22	13629	12.93	7.74	2.60
SMARCC2	7.70	0.60	7.67	4.91	10.40	13629	12.93	7.74	2.12
C20orf9	8.04	0.62	8.08	3.29	10.66	13629	12.93	7.74	3.24
KIAA0553	7.71	0.60	7.62	4.30	11.03	13629	12.93	7.74	2.57
ALDOA	11.94	0.92	12.06	0.93	14.03	13629	12.92	7.74	15.15
SCAP	8.25	0.64	8.27	3.31	11.67	13629	12.92	7.74	3.52
76P	7.43	0.58	7.38	3.09	10.02	13629	12.91	7.74	3.25
CAP1	10.56	0.82	10.60	6.44	13.66	13629	12.91	7.74	2.12
NDUFB6	9.49	0.74	9.57	4.29	11.95	13629	12.91	7.75	2.79
CNIH	9.73	0.75	9.81	6.03	11.91	13629	12.90	7.75	1.97
SCYE1	8.44	0.65	8.53	5.08	11.70	13629	12.90	7.75	2.30
LOC400843	7.84	0.61	7.78	5.45	10.95	13629	12.90	7.75	2.01
LUC7L2	8.29	0.64	8.31	4.93	11.88	13629	12.90	7.75	2.41
MAP3K7IP2	8.19	0.63	8.19	5.24	10.73	13629	12.89	7.76	2.05
NFS1	7.64	0.59	7.65	2.43	10.11	13629	12.89	7.76	4.15
CCNH	8.71	0.68	8.72	4.74	11.88	13629	12.88	7.76	2.51
AZIN1	9.27	0.72	9.30	5.58	11.90	13629	12.88	7.76	2.13
FAM48A	7.33	0.57	7.32	4.60	9.91	13629	12.87	7.77	2.15
PSMA4	9.93	0.77	9.98	5.01	12.32	13629	12.87	7.77	2.46
TIMM8B	10.22	0.79	10.29	6.47	12.54	13629	12.86	7.77	1.94
SART1	7.70	0.60	7.68	4.40	10.30	13629	12.86	7.77	2.34
ADCK2	6.49	0.50	6.48	4.33	9.43	13629	12.86	7.78	2.18
BFAR	8.09	0.63	8.14	3.82	11.08	13629	12.86	7.78	2.90
KIAA1698	7.47	0.58	7.44	2.89	11.19	13629	12.85	7.78	3.88
PSMD6	10.10	0.79	10.04	4.74	13.43	13629	12.85	7.78	2.84
RAB3GAP1	8.32	0.65	8.28	5.13	11.53	13629	12.85	7.78	2.25
YY1	8.85	0.69	8.91	6.33	11.26	13629	12.85	7.78	1.78
DCTN2	9.16	0.71	9.16	4.30	12.43	13629	12.85	7.78	2.89
NDUFS6	9.90	0.77	9.90	5.00	13.16	13629	12.84	7.79	2.63
BRP44	9.48	0.74	9.46	6.47	12.91	13629	12.83	7.79	2.00
PSMD4	9.23	0.72	9.26	5.50	12.04	13629	12.83	7.79	2.19
CD63	11.69	0.91	11.88	6.00	14.03	13629	12.83	7.79	2.34
KIAA0251	9.08	0.71	9.06	3.94	11.59	13629	12.83	7.80	2.94
TRIP4	7.88	0.61	7.97	2.58	10.43	13629	12.82	7.80	4.03
THRAP1	8.88	0.69	8.92	4.73	12.17	13629	12.82	7.80	2.57
TFG	8.87	0.69	8.92	5.11	11.01	13629	12.81	7.80	2.15
COX6C	11.64	0.91	11.70	5.99	14.03	13629	12.81	7.80	2.34
SYNCRIP	8.81	0.69	8.82	5.89	10.85	13629	12.81	7.80	1.84
RPL18	11.14	0.87	11.34	7.12	12.91	13629	12.81	7.81	1.81
SUMO4	8.95	0.70	8.95	3.02	12.38	13629	12.81	7.81	4.10
PRKRIR	9.04	0.71	9.07	4.11	12.62	13629	12.80	7.81	3.07
CARS	9.13	0.71	9.07	6.93	12.74	13629	12.80	7.81	1.84
UGP2	10.21	0.80	10.16	5.28	14.03	13629	12.79	7.82	2.66
ADH5	8.92	0.70	8.93	4.34	11.22	13629	12.79	7.82	2.58
TSC1	8.02	0.63	8.00	5.54	11.11	13629	12.79	7.82	2.01
PDCD11	7.61	0.60	7.54	4.82	10.08	13629	12.78	7.82	2.09
H2AFY	9.67	0.76	9.69	6.35	12.58	13629	12.78	7.82	1.98
DNAJC16	6.98	0.55	7.05	3.57	9.78	13629	12.78	7.82	2.74
POLS	8.80	0.69	8.79	5.74	12.91	13629	12.77	7.83	2.25
ATP5J	10.44	0.82	10.46	3.31	12.88	13629	12.77	7.83	3.90
ZNF384	8.42	0.66	8.39	4.39	11.56	13629	12.77	7.83	2.63
PIN4	7.85	0.61	7.77	5.71	10.94	13629	12.77	7.83	1.92
NSUN3	7.11	0.56	7.15	2.49	9.91	13629	12.77	7.83	3.98
DGCR8	6.82	0.53	6.84	4.72	9.83	13629	12.77	7.83	2.08
UBP1	8.68	0.68	8.72	2.28	11.43	13629	12.76	7.83	5.00
MKRN1	8.94	0.70	8.89	5.61	12.83	13629	12.76	7.83	2.29
TMEM50A	8.65	0.68	8.70	3.78	11.19	13629	12.76	7.84	2.96
FZR1	6.43	0.50	6.41	3.00	9.11	13629	12.76	7.84	3.04
PSME1	10.31	0.81	10.36	5.59	13.02	13629	12.75	7.84	2.33
ZBTB5	8.08	0.63	8.10	3.94	10.84	13629	12.75	7.84	2.75
ILF3	8.31	0.65	8.29	5.85	11.60	13629	12.74	7.85	1.98
SDAD1	8.19	0.64	8.25	4.47	11.33	13629	12.73	7.86	2.54
C10orf22	7.90	0.62	7.91	2.81	10.61	13629	12.73	7.86	3.78
LARS	8.78	0.69	8.76	4.39	12.34	13629	12.73	7.86	2.81
TMEM43	9.02	0.71	9.06	4.92	11.68	13629	12.73	7.86	2.37
HMGN3	10.57	0.83	10.61	3.32	13.40	13629	12.72	7.86	4.03
IDE	7.77	0.61	7.76	4.51	10.81	13629	12.72	7.86	2.40
KLHDC2	9.49	0.75	9.51	6.09	12.30	13629	12.71	7.86	2.02
SFRS2	10.25	0.81	10.26	6.80	13.26	13629	12.71	7.87	1.95
TRAP1	9.02	0.71	9.01	4.50	11.49	13629	12.71	7.87	2.55
YTHDF2	9.24	0.73	9.33	3.49	11.58	13629	12.71	7.87	3.32
FOXJ2	8.05	0.63	8.06	4.30	10.50	13629	12.71	7.87	2.44
DHDDS	7.30	0.57	7.26	2.74	10.26	13629	12.71	7.87	3.74
TNPO1	9.52	0.75	9.55	6.25	12.64	13629	12.70	7.87	2.02
RENT1	7.31	0.58	7.28	3.77	9.86	13629	12.70	7.87	2.62
MTF1	7.23	0.57	7.19	2.83	10.12	13629	12.70	7.88	3.58
POLR3C	7.47	0.59	7.44	4.13	9.60	13629	12.70	7.88	2.32
STK19	7.92	0.62	7.91	5.58	12.15	13629	12.69	7.88	2.18
ARFGEF1	7.94	0.63	7.94	5.29	12.01	13629	12.69	7.88	2.27
AIP	8.36	0.66	8.36	5.42	11.20	13629	12.68	7.88	2.07
PMS2L3	7.97	0.63	7.97	4.83	10.98	13629	12.68	7.88	2.27
EI24	8.42	0.66	8.42	5.54	10.79	13629	12.68	7.88	1.95
DGUOK	8.25	0.65	8.30	4.57	10.89	13629	12.67	7.89	2.38
ARPP-19	8.93	0.70	8.88	5.82	12.37	13629	12.67	7.89	2.12
LOC55831	9.29	0.73	9.28	4.34	12.83	13629	12.67	7.89	2.96
PFDN1	8.20	0.65	8.23	3.52	10.29	13629	12.66	7.90	2.92
DBI	10.76	0.85	10.82	5.94	13.56	13629	12.66	7.90	2.28
ZNF419	7.62	0.60	7.62	3.94	10.58	13629	12.66	7.90	2.69
MULK	7.47	0.59	7.42	4.59	10.18	13629	12.66	7.90	2.22
HSPA9B	9.14	0.72	9.17	5.65	11.25	13629	12.65	7.90	1.99
AP3B1	7.47	0.59	7.48	4.24	10.87	13629	12.65	7.91	2.56
WDR45	8.09	0.64	8.07	4.54	11.36	13629	12.64	7.91	2.50
CBARA1	8.47	0.67	8.50	2.84	10.75	13629	12.64	7.91	3.78
GTF2I	9.57	0.76	9.58	6.32	12.24	13629	12.64	7.91	1.94
RAP80	7.93	0.63	7.88	4.00	11.13	13629	12.63	7.92	2.78
SPOP	8.48	0.67	8.48	4.76	11.98	13629	12.62	7.93	2.52
SNX27	7.77	0.62	7.71	2.25	10.17	13629	12.62	7.93	4.53
ZMPSTE24	9.60	0.76	9.67	5.67	12.76	13629	12.62	7.93	2.25
PPIE	7.52	0.60	7.46	3.29	11.40	13629	12.61	7.93	3.46
DDX1	9.72	0.77	9.82	3.80	13.90	13629	12.61	7.93	3.66
API5	7.37	0.58	7.39	4.78	9.81	13629	12.61	7.93	2.05
ZNF289	8.75	0.69	8.82	4.78	11.01	13629	12.61	7.93	2.30
HNRPUL1	8.38	0.66	8.39	4.89	10.81	13629	12.61	7.93	2.21
FNBP3	9.22	0.73	9.27	5.75	11.32	13629	12.61	7.93	1.97
KIAA0853	7.32	0.58	7.33	4.20	10.66	13629	12.59	7.94	2.54
TMED9	10.01	0.80	10.08	7.27	13.16	13629	12.59	7.94	1.81
CXorf40B	8.52	0.68	8.48	5.17	12.03	13629	12.59	7.94	2.33
AARS	9.66	0.77	9.68	4.23	12.62	13629	12.58	7.95	2.98
VPS52	9.07	0.72	9.10	4.66	11.55	13629	12.58	7.95	2.48
LSM1	9.11	0.72	9.15	4.00	12.83	13629	12.57	7.96	3.21
RAD1	7.65	0.61	7.60	4.42	10.19	13629	12.57	7.96	2.31
FTSJ3	8.36	0.67	8.29	5.35	11.61	13629	12.57	7.96	2.17
KIAA0674	7.71	0.61	7.69	3.47	10.34	13629	12.56	7.96	2.98
C9orf97	7.81	0.62	7.80	2.70	10.68	13629	12.56	7.96	3.95
PTTG1IP	10.72	0.85	10.82	3.55	14.03	13629	12.56	7.96	3.95
SKIV2L2	7.56	0.60	7.58	5.24	11.40	13629	12.56	7.96	2.18
USP47	8.70	0.69	8.67	4.04	11.84	13629	12.56	7.96	2.93
PMS2L5	8.51	0.68	8.49	4.57	11.12	13629	12.55	7.97	2.43
PEX26	7.12	0.57	7.13	4.08	9.79	13629	12.55	7.97	2.40
WDR70	7.46	0.59	7.48	2.47	10.00	13629	12.55	7.97	4.04
TUBGCP2	6.91	0.55	7.00	3.98	8.79	13629	12.54	7.97	2.21
HADH2	9.46	0.75	9.48	5.23	12.27	13629	12.54	7.98	2.35
SAR1A	8.23	0.66	8.24	5.42	11.36	13629	12.54	7.98	2.09
MRFAP1L1	8.89	0.71	8.93	3.67	11.88	13629	12.53	7.98	3.24
C1orf37	8.07	0.64	8.08	4.63	10.68	13629	12.53	7.98	2.31
GLG1	8.86	0.71	8.86	5.57	12.21	13629	12.53	7.98	2.19
CSTF3	8.45	0.67	8.47	4.14	11.35	13629	12.53	7.98	2.74
SNRPD2	11.00	0.88	11.15	5.58	13.66	13629	12.52	7.98	2.45
FLJ20859	8.69	0.69	8.72	4.34	12.60	13629	12.52	7.99	2.90
SRP54	8.63	0.69	8.67	3.84	12.33	13629	12.52	7.99	3.21
TUFM	10.12	0.81	10.20	3.87	12.88	13629	12.51	7.99	3.33
ETEA	7.73	0.62	7.75	4.02	10.71	13629	12.50	8.00	2.66
HADHB	10.22	0.82	10.13	6.15	13.66	13629	12.50	8.00	2.22
NMT1	7.52	0.60	7.50	4.24	9.82	13629	12.49	8.00	2.32
SEC61B	10.54	0.84	10.57	7.52	13.22	13629	12.49	8.01	1.76
KIAA0947	8.19	0.66	8.21	3.04	10.74	13629	12.49	8.01	3.54
UCRC	10.93	0.88	11.03	5.16	13.82	13629	12.49	8.01	2.68
ZNF337	6.72	0.54	6.71	5.13	9.64	13629	12.49	8.01	1.88
HFE	6.34	0.51	6.32	4.20	8.11	13629	12.49	8.01	1.93
POLR1C	7.60	0.61	7.54	5.33	11.30	13629	12.48	8.01	2.12
PEX11B	8.28	0.66	8.31	2.46	11.21	13629	12.47	8.02	4.56
NDUFA4	10.83	0.87	10.85	3.04	13.34	13629	12.47	8.02	4.38
DDX27	8.54	0.68	8.51	5.92	12.12	13629	12.46	8.02	2.05
GPBP1L1	8.62	0.69	8.61	3.09	11.78	13629	12.46	8.02	3.82
RELA	8.33	0.67	8.35	5.25	11.05	13629	12.46	8.03	2.11
FLJ22405	8.11	0.65	8.05	4.39	11.25	13629	12.46	8.03	2.56
HSPD1	11.20	0.90	11.22	7.57	13.82	13629	12.46	8.03	1.82
MRPL33	9.55	0.77	9.55	4.29	12.53	13629	12.45	8.03	2.92
MTMR4	8.11	0.65	8.10	3.20	11.72	13629	12.45	8.03	3.66
SCAMP3	8.85	0.71	8.89	4.52	12.43	13629	12.45	8.03	2.75
NUDCD3	7.77	0.62	7.71	4.82	10.82	13629	12.44	8.04	2.24
PFDN2	9.18	0.74	9.17	5.13	12.35	13629	12.44	8.04	2.41
HMG2L1	7.78	0.63	7.81	3.66	10.22	13629	12.44	8.04	2.80
KIAA0323	7.80	0.63	7.80	4.44	11.45	13629	12.44	8.04	2.58
ENTH	8.84	0.71	8.79	5.30	12.23	13629	12.44	8.04	2.31
C20orf29	7.25	0.58	7.25	3.00	9.57	13629	12.44	8.04	3.19
FDFT1	9.96	0.80	9.95	5.36	13.28	13629	12.43	8.04	2.48
UXT	9.74	0.78	9.76	3.07	12.56	13629	12.43	8.05	4.09
ARPC5L	9.64	0.78	9.60	3.99	12.89	13629	12.43	8.05	3.23
HTATIP	8.02	0.65	8.09	4.08	10.14	13629	12.42	8.05	2.49
SETDB1	7.12	0.57	7.12	3.25	9.39	13629	12.42	8.05	2.89
DNCL1	11.06	0.89	11.25	4.84	14.03	13629	12.41	8.06	2.90
C9orf74	8.11	0.65	8.16	4.15	11.23	13629	12.41	8.06	2.71
ATP1B3	10.53	0.85	10.52	6.26	14.03	13629	12.40	8.06	2.24
SUPT16H	9.21	0.74	9.23	4.47	12.32	13629	12.40	8.07	2.76
MGC10433	8.07	0.65	8.09	3.04	11.02	13629	12.39	8.07	3.63
MKNK1	8.45	0.68	8.41	4.99	11.64	13629	12.39	8.07	2.33
DDX10	8.04	0.65	8.04	3.00	12.43	13629	12.39	8.07	4.14
SFRS7	8.98	0.73	8.99	6.24	11.61	13629	12.39	8.07	1.86
AUP1	8.53	0.69	8.59	2.46	11.44	13629	12.38	8.08	4.65
FAM35A	9.06	0.73	9.14	4.17	11.79	13629	12.38	8.08	2.83
MTHFS	7.43	0.60	7.36	5.06	10.17	13629	12.38	8.08	2.01
FLJ11806	7.73	0.62	7.78	4.29	10.28	13629	12.38	8.08	2.40
DDX18	8.36	0.68	8.41	4.93	10.67	13629	12.37	8.08	2.17
FTSJ1	7.85	0.63	7.81	4.53	10.41	13629	12.37	8.08	2.30
C11orf2	9.43	0.76	9.40	3.23	12.24	13629	12.37	8.08	3.79
KIAA1012	9.03	0.73	9.08	3.81	11.95	13629	12.37	8.08	3.14
FLJ10241	7.92	0.64	7.93	4.89	10.36	13629	12.37	8.08	2.12
HSPC142	8.37	0.68	8.39	2.84	11.14	13629	12.37	8.08	3.93
NPL4	8.47	0.69	8.48	4.03	10.74	13629	12.37	8.09	2.67
KIAA0859	7.48	0.61	7.43	3.97	9.91	13629	12.36	8.09	2.49
PSMD14	9.88	0.80	9.99	3.47	12.21	13629	12.36	8.09	3.52
ARHGAP1	8.40	0.68	8.41	6.15	11.26	13629	12.35	8.10	1.83
IPO7	9.04	0.73	9.13	5.57	11.56	13629	12.35	8.10	2.08
SFPQ	9.08	0.74	9.05	6.20	11.96	13629	12.34	8.10	1.93
RNF10	8.38	0.68	8.28	5.99	12.79	13629	12.34	8.10	2.14
IARS	10.19	0.83	10.21	4.15	13.26	13629	12.34	8.10	3.19
C1orf16	7.31	0.59	7.30	4.08	9.73	13629	12.34	8.11	2.39
INPP5E	7.64	0.62	7.61	3.87	10.63	13629	12.34	8.11	2.74
PSMB6	9.59	0.78	9.60	3.28	12.37	13629	12.33	8.11	3.77
HSPC009	9.70	0.79	9.80	5.63	12.83	13629	12.33	8.11	2.28
MEN1	7.81	0.63	7.84	3.28	10.61	13629	12.33	8.11	3.24
CDC27	7.15	0.58	7.15	4.65	10.12	13629	12.33	8.11	2.18
MRCL3	10.52	0.85	10.59	5.17	13.09	13629	12.32	8.11	2.53
ARL6IP5	10.26	0.83	10.37	6.53	13.20	13629	12.32	8.11	2.02
OTUB1	8.57	0.70	8.60	6.28	12.29	13629	12.32	8.12	1.96
KIAA1055	7.14	0.58	7.14	4.01	9.43	13629	12.32	8.12	2.35
BCDIN3	8.39	0.68	8.40	4.13	11.08	13629	12.32	8.12	2.68
CCT3	10.39	0.84	10.43	5.51	13.05	13629	12.32	8.12	2.37
GAK	8.73	0.71	8.72	6.30	12.40	13629	12.32	8.12	1.97
ZW10	7.85	0.64	7.90	2.72	10.47	13629	12.32	8.12	3.85
DDX47	9.49	0.77	9.46	3.98	12.88	13629	12.32	8.12	3.24
HCCS	7.86	0.64	7.85	4.01	10.29	13629	12.31	8.12	2.57
AP3D1	8.11	0.66	8.15	4.02	11.00	13629	12.31	8.12	2.74
C21orf33	8.55	0.69	8.53	4.55	11.04	13629	12.31	8.12	2.43
LARP5	7.14	0.58	7.18	4.77	9.14	13629	12.31	8.12	1.92
ZNHIT3	8.47	0.69	8.52	2.34	11.67	13629	12.31	8.13	4.99
PANK4	7.18	0.58	7.18	2.31	9.90	13629	12.30	8.13	4.28
DATF1	7.50	0.61	7.49	3.83	10.30	13629	12.30	8.13	2.69
G3BP	8.29	0.67	8.33	5.61	10.73	13629	12.30	8.13	1.91
DPH1	7.47	0.61	7.42	4.63	10.57	13629	12.30	8.13	2.28
BTN2A1	7.74	0.63	7.70	4.02	11.19	13629	12.30	8.13	2.78
JAK1	9.88	0.80	9.92	4.21	12.60	13629	12.30	8.13	2.99
C19orf29	6.97	0.57	7.05	4.07	9.41	13629	12.29	8.13	2.31
GTDC1	6.84	0.56	6.87	3.47	8.93	13629	12.29	8.14	2.57
FLJ11301	7.77	0.63	7.74	4.00	10.99	13629	12.28	8.14	2.75
PUM2	8.61	0.70	8.71	4.15	11.21	13629	12.28	8.14	2.70
FLJ22318	7.21	0.59	7.17	4.33	10.71	13629	12.28	8.14	2.47
HSGT1	7.55	0.61	7.52	2.63	11.89	13629	12.28	8.15	4.53
KHSRP	7.95	0.65	7.92	5.52	10.41	13629	12.28	8.15	1.89
NOLA2	10.07	0.82	10.03	5.02	12.57	13629	12.28	8.15	2.50
NOLC1	8.48	0.69	8.41	4.54	11.48	13629	12.27	8.15	2.53
TAF9	8.69	0.71	8.73	4.63	10.81	13629	12.27	8.15	2.34
POLR3B	7.55	0.62	7.54	2.82	11.04	13629	12.27	8.15	3.92
BIRC2	9.45	0.77	9.51	2.99	12.67	13629	12.27	8.15	4.24
TPI1	10.32	0.84	10.34	7.26	12.67	13629	12.26	8.15	1.74
SEC13L1	9.58	0.78	9.60	3.08	13.43	13629	12.26	8.16	4.36
MGC5242	8.06	0.66	8.08	4.66	10.43	13629	12.26	8.16	2.24
RWDD1	9.02	0.74	9.09	2.83	12.17	13629	12.26	8.16	4.30
TOR1B	7.93	0.65	7.95	2.51	11.21	13629	12.25	8.16	4.46
Mar-05	7.99	0.65	8.01	3.73	10.40	13629	12.25	8.16	2.79
ATP6V1E1	9.47	0.77	9.49	3.74	12.45	13629	12.25	8.17	3.33
SCFD1	8.25	0.67	8.31	2.94	11.73	13629	12.25	8.17	3.99
PGK1	10.08	0.82	10.17	5.82	12.75	13629	12.24	8.17	2.19
TTF1	7.26	0.59	7.23	3.84	10.16	13629	12.24	8.17	2.65
KS	7.59	0.62	7.58	3.80	10.33	13629	12.24	8.17	2.72
GOLGA1	6.65	0.54	6.71	4.15	9.08	13629	12.23	8.17	2.19
XPC	8.22	0.67	8.23	4.12	10.91	13629	12.23	8.18	2.65
RABIF	7.14	0.58	7.14	3.00	9.89	13629	12.23	8.18	3.30
FLJ10587	7.98	0.65	7.96	3.22	11.55	13629	12.23	8.18	3.59
VAMP3	9.23	0.76	9.30	4.49	12.16	13629	12.22	8.18	2.71
C17orf25	8.41	0.69	8.45	3.19	10.83	13629	12.22	8.18	3.40
SS18L2	8.57	0.70	8.55	4.96	11.61	13629	12.22	8.19	2.34
VPS72	8.62	0.71	8.66	2.76	11.51	13629	12.21	8.19	4.17
BMS1L	8.07	0.66	8.10	3.12	10.65	13629	12.20	8.19	3.41
POLDIP3	7.03	0.58	7.08	4.59	9.36	13629	12.20	8.19	2.04
AKR1A1	9.43	0.77	9.45	5.81	12.48	13629	12.20	8.20	2.15
NFATC2IP	7.72	0.63	7.70	4.73	10.59	13629	12.20	8.20	2.24
DDX19A	7.33	0.60	7.34	3.07	9.71	13629	12.19	8.20	3.16
ARIH2	7.06	0.58	7.08	4.71	9.13	13629	12.19	8.20	1.94
YWHAE	10.12	0.83	10.23	6.60	12.87	13629	12.19	8.20	1.95
SAPS2	6.70	0.55	6.68	4.59	9.98	13629	12.19	8.21	2.17
SAPS3	8.19	0.67	8.23	3.99	10.63	13629	12.19	8.21	2.67
RBM25	8.20	0.67	8.21	5.11	12.33	13629	12.19	8.21	2.41
NUDT9	7.97	0.65	8.00	2.66	10.86	13629	12.18	8.21	4.09
TCEB2	9.43	0.77	9.55	4.81	11.81	13629	12.18	8.21	2.45
GTF2F1	7.43	0.61	7.40	4.67	10.14	13629	12.18	8.21	2.17
SNX13	6.77	0.56	6.84	4.32	9.00	13629	12.18	8.21	2.08
SHOC2	8.68	0.71	8.72	2.93	11.52	13629	12.18	8.21	3.94
CYFIP1	8.92	0.73	9.00	4.02	12.15	13629	12.17	8.21	3.02
IMP4	8.68	0.71	8.68	3.10	11.84	13629	12.17	8.22	3.82
TXNL4A	8.86	0.73	8.91	4.80	11.48	13629	12.17	8.22	2.39
CGGBP1	8.68	0.71	8.71	5.65	11.53	13629	12.16	8.22	2.04
SFRS14	7.37	0.61	7.28	4.22	10.39	13629	12.16	8.23	2.46
RNF187	9.29	0.76	9.31	3.37	12.06	13629	12.15	8.23	3.58
ADNP	8.43	0.69	8.49	4.92	10.70	13629	12.15	8.23	2.18
HSPA5	11.06	0.91	11.14	4.29	14.03	13629	12.15	8.23	3.27
GPAA1	8.78	0.72	8.77	5.09	12.29	13629	12.15	8.23	2.41
FBXO42	7.03	0.58	7.07	2.48	9.37	13629	12.15	8.23	3.78
MUTYH	7.68	0.63	7.66	2.77	11.51	13629	12.14	8.24	4.16
PRDX1	11.37	0.94	11.47	5.48	13.90	13629	12.14	8.24	2.54
PSAP	11.33	0.93	11.49	5.75	13.73	13629	12.14	8.24	2.39
UBE4B	7.11	0.59	7.17	3.98	9.36	13629	12.13	8.24	2.35
EDD1	8.14	0.67	8.20	5.00	11.05	13629	12.13	8.24	2.21
MRPS22	7.58	0.62	7.62	4.77	11.20	13629	12.13	8.25	2.35
CHD8	8.05	0.66	8.10	3.72	11.22	13629	12.13	8.25	3.01
ZNF576	6.68	0.55	6.70	3.58	8.75	13629	12.13	8.25	2.44
FLJ13491	7.02	0.58	7.08	3.63	9.49	13629	12.12	8.25	2.61
ARID1A	8.49	0.70	8.46	4.49	11.06	13629	12.12	8.25	2.47
RBM8A	7.73	0.64	7.76	4.06	10.08	13629	12.12	8.25	2.49
NDUFB3	9.49	0.78	9.51	3.54	12.38	13629	12.12	8.25	3.50
UBE3A	7.64	0.63	7.63	4.69	9.63	13629	12.12	8.25	2.05
CDS2	7.66	0.63	7.61	4.19	10.15	13629	12.11	8.25	2.42
GOLGB1	8.33	0.69	8.32	4.87	11.58	13629	12.11	8.26	2.38
FLJ11305	8.18	0.68	8.21	2.58	12.47	13629	12.11	8.26	4.82
JTV1	9.18	0.76	9.16	5.09	11.89	13629	12.11	8.26	2.34
HARS	8.56	0.71	8.58	2.81	12.07	13629	12.10	8.26	4.29
DHX32	8.51	0.70	8.54	4.11	11.44	13629	12.10	8.26	2.78
GRPEL1	8.14	0.67	8.16	4.17	10.29	13629	12.10	8.26	2.47
RBM4	8.26	0.68	8.24	4.35	10.96	13629	12.09	8.27	2.52
USP4	8.55	0.71	8.52	6.11	12.37	13629	12.09	8.27	2.03
FLJ20558	7.00	0.58	7.05	2.81	10.82	13629	12.09	8.27	3.85
ALG5	9.24	0.76	9.27	5.63	12.36	13629	12.09	8.27	2.19
FLJ34077	6.86	0.57	6.89	2.43	9.54	13629	12.09	8.27	3.93
ATP6V0C	9.99	0.83	10.05	6.30	12.62	13629	12.08	8.27	2.00
ATP5H	11.10	0.92	11.24	5.98	13.90	13629	12.08	8.28	2.33
DOLPP1	8.05	0.67	8.09	3.88	11.23	13629	12.08	8.28	2.89
ELAVL1	8.93	0.74	9.01	4.49	10.88	13629	12.08	8.28	2.42
WDR42A	7.44	0.62	7.37	4.83	9.71	13629	12.08	8.28	2.01
RAB1B	8.95	0.74	8.98	4.19	11.98	13629	12.08	8.28	2.86
PCMT1	9.07	0.75	9.10	5.31	12.01	13629	12.07	8.28	2.26
DNCI2	9.81	0.81	9.92	5.76	13.14	13629	12.07	8.28	2.28
TSEN34	8.83	0.73	8.87	4.93	11.50	13629	12.07	8.29	2.33
KIAA1049	8.40	0.70	8.45	5.15	11.74	13629	12.06	8.29	2.28
GTPBP3	7.83	0.65	7.79	3.05	11.46	13629	12.06	8.29	3.75
Sep-07	9.60	0.80	9.68	6.61	12.56	13629	12.06	8.29	1.90
VPS24	8.95	0.74	9.05	4.73	11.80	13629	12.05	8.30	2.49
DKFZP564O1664	7.54	0.63	7.54	3.21	9.98	13629	12.05	8.30	3.11
DKFZP564M082	7.98	0.66	8.00	3.57	11.48	13629	12.05	8.30	3.21
TM9SF4	7.88	0.65	7.85	5.04	10.67	13629	12.05	8.30	2.12
PPA1	10.82	0.90	10.87	4.08	13.73	13629	12.05	8.30	3.37
SYBL1	8.95	0.74	9.00	3.12	11.97	13629	12.05	8.30	3.84
EXT2	7.80	0.65	7.76	4.61	10.70	13629	12.04	8.30	2.32
IMP3	8.67	0.72	8.68	4.72	11.45	13629	12.04	8.30	2.43
C13orf22	7.59	0.63	7.51	3.84	10.35	13629	12.04	8.30	2.70
UBL5	9.53	0.79	9.63	3.71	12.50	13629	12.04	8.31	3.37
TARBP2	7.57	0.63	7.53	3.08	10.26	13629	12.04	8.31	3.33
KIAA0082	7.68	0.64	7.69	3.08	11.05	13629	12.04	8.31	3.59
PPT1	10.24	0.85	10.26	7.10	13.90	13629	12.04	8.31	1.96
CDK5RAP3	9.48	0.79	9.50	5.27	13.02	13629	12.03	8.31	2.47
PREB	8.14	0.68	8.10	3.43	11.25	13629	12.03	8.31	3.28
C19orf7	8.47	0.70	8.50	3.19	12.62	13629	12.03	8.31	3.96
TERF2IP	9.21	0.77	9.17	3.55	12.36	13629	12.03	8.32	3.48
LASP1	10.08	0.84	10.13	6.06	13.51	13629	12.03	8.32	2.23
ATPIF1	9.23	0.77	9.22	3.62	12.86	13629	12.02	8.32	3.55
GGA2	6.98	0.58	6.95	5.05	10.66	13629	12.02	8.32	2.11
LEPROTL1	8.47	0.70	8.40	5.66	12.16	13629	12.02	8.32	2.15
NFRKB	7.14	0.59	7.17	4.02	9.69	13629	12.02	8.32	2.41
ARPC5	10.30	0.86	10.38	4.39	12.63	13629	12.02	8.32	2.87
MAP2K4	7.32	0.61	7.30	3.91	11.28	13629	12.02	8.32	2.88
COPS5	9.15	0.76	9.22	5.01	11.33	13629	12.01	8.33	2.26
C20orf18	8.32	0.69	8.32	4.09	12.19	13629	12.01	8.33	2.98
SNX1	7.31	0.61	7.32	2.41	10.45	13629	12.01	8.33	4.34
ZNF261	7.96	0.66	7.94	3.22	10.96	13629	12.00	8.33	3.41
DUT	9.54	0.79	9.58	6.30	12.06	13629	12.00	8.33	1.92
UQCRB	10.45	0.87	10.57	5.55	12.79	13629	12.00	8.33	2.30
HSPCB	11.35	0.95	11.49	5.52	13.37	13629	11.99	8.34	2.42
KPNA6	7.61	0.63	7.56	5.13	10.40	13629	11.99	8.34	2.03
SUPT6H	7.55	0.63	7.54	5.11	11.59	13629	11.99	8.34	2.27
NDUFA1	10.71	0.89	10.74	6.17	13.61	13629	11.98	8.34	2.21
COPS2	8.79	0.73	8.86	3.81	11.14	13629	11.98	8.35	2.92
LZTR1	7.65	0.64	7.63	2.87	10.92	13629	11.98	8.35	3.81
SRPRB	9.24	0.77	9.21	4.15	12.35	13629	11.98	8.35	2.97
LGTN	8.72	0.73	8.77	3.77	11.55	13629	11.98	8.35	3.07
ATP6V1D	8.53	0.71	8.49	5.91	11.13	13629	11.98	8.35	1.88
MRPS27	8.60	0.72	8.60	3.00	11.52	13629	11.97	8.35	3.84
NOL1	8.41	0.70	8.42	3.28	11.94	13629	11.97	8.35	3.64
TERF2	8.22	0.69	8.16	5.27	12.71	13629	11.97	8.35	2.41
UBE3C	8.16	0.68	8.20	2.84	10.86	13629	11.97	8.36	3.83
FLJ30656	7.91	0.66	7.93	4.92	12.91	13629	11.97	8.36	2.63
DDX41	8.58	0.72	8.60	2.85	11.71	13629	11.96	8.36	4.11
SF3A3	7.85	0.66	7.85	4.33	10.71	13629	11.96	8.36	2.47
VDAC3	9.59	0.80	9.58	6.80	12.58	13629	11.96	8.36	1.85
ZNF592	7.12	0.60	7.13	3.15	9.74	13629	11.95	8.37	3.09
MGC3121	8.19	0.69	8.19	5.06	10.87	13629	11.95	8.37	2.15
NIFIE14	9.71	0.81	9.75	4.11	12.60	13629	11.95	8.37	3.06
WDR23	7.69	0.64	7.70	3.19	11.13	13629	11.95	8.37	3.49
PPP4R1	8.88	0.74	8.87	3.85	12.01	13629	11.95	8.37	3.12
NDUFA3	9.51	0.80	9.52	3.10	12.21	13629	11.95	8.37	3.93
ISG20L2	7.41	0.62	7.38	4.26	10.14	13629	11.94	8.37	2.38
MTCP1	7.28	0.61	7.21	4.29	10.86	13629	11.94	8.37	2.53
DPM1	9.53	0.80	9.57	3.51	12.00	13629	11.94	8.37	3.42
C14orf130	8.19	0.69	8.20	4.31	10.95	13629	11.94	8.38	2.54
ARD1A	8.02	0.67	8.00	3.56	11.93	13629	11.94	8.38	3.35
CLUAP1	6.67	0.56	6.68	3.83	9.80	13629	11.94	8.38	2.56
GCDH	7.00	0.59	7.03	2.70	9.98	13629	11.93	8.38	3.69
AHSA1	9.32	0.78	9.35	2.96	12.40	13629	11.93	8.38	4.18
IPO9	7.99	0.67	7.98	4.22	10.62	13629	11.93	8.38	2.51
CLNS1A	9.29	0.78	9.32	2.77	12.89	13629	11.93	8.38	4.65
SCAND1	8.62	0.72	8.67	2.83	12.23	13629	11.93	8.38	4.32
HELZ	8.33	0.70	8.38	2.29	10.95	13629	11.92	8.39	4.78
ARCN1	9.25	0.78	9.31	2.14	11.67	13629	11.92	8.39	5.44
VPS28	9.23	0.77	9.29	2.44	12.19	13629	11.92	8.39	5.00
PRUNE	7.35	0.62	7.29	4.47	11.08	13629	11.92	8.39	2.48
DCTD	8.23	0.69	8.28	4.00	10.74	13629	11.92	8.39	2.68
ITGAE	9.13	0.77	9.11	4.86	12.29	13629	11.92	8.39	2.53
TRIAD3	6.99	0.59	7.04	2.42	9.51	13629	11.91	8.39	3.93
NRF1	6.02	0.51	5.98	2.78	8.19	13629	11.91	8.40	2.94
NCK2	8.95	0.75	8.94	2.50	12.08	13629	11.90	8.40	4.83
LOC57149	8.33	0.70	8.33	3.12	11.05	13629	11.90	8.40	3.54
LOC162427	9.13	0.77	9.09	5.74	12.70	13629	11.90	8.40	2.21
LAMP1	10.03	0.84	10.12	7.17	13.09	13629	11.90	8.41	1.82
VRK3	7.55	0.63	7.49	4.80	10.81	13629	11.89	8.41	2.25
KPNA3	8.48	0.71	8.45	5.09	11.60	13629	11.89	8.41	2.28
PHC2	9.11	0.77	9.16	4.59	12.00	13629	11.89	8.41	2.61
HEATR1	8.27	0.70	8.29	5.10	10.73	13629	11.89	8.41	2.10
KTN1	9.69	0.81	9.74	5.08	12.76	13629	11.89	8.41	2.51
PRKCSH	9.11	0.77	9.15	4.66	12.18	13629	11.89	8.41	2.61
APH1A	8.93	0.75	8.98	5.68	12.56	13629	11.89	8.41	2.21
PBP	10.40	0.87	10.41	4.73	13.34	13629	11.89	8.41	2.82
RANBP2	8.23	0.69	8.28	4.75	11.36	13629	11.88	8.42	2.39
AATF	8.37	0.70	8.41	4.67	11.69	13629	11.88	8.42	2.50
NEDD8	9.63	0.81	9.71	3.73	12.20	13629	11.88	8.42	3.27
TCTA	7.97	0.67	7.99	2.83	10.69	13629	11.88	8.42	3.78
RIOK3	8.49	0.71	8.47	6.40	12.01	13629	11.88	8.42	1.88
HPS6	7.50	0.63	7.53	3.63	9.72	13629	11.88	8.42	2.68
SPG7	8.05	0.68	8.08	3.66	10.62	13629	11.88	8.42	2.91
SYF2	8.74	0.74	8.77	3.17	12.19	13629	11.88	8.42	3.85
RSAD1	7.96	0.67	8.01	2.98	11.81	13629	11.87	8.42	3.96
C17orf40	8.22	0.69	8.20	4.19	10.70	13629	11.87	8.42	2.55
SAFB2	7.43	0.63	7.34	4.65	10.74	13629	11.87	8.42	2.31
KIAA1076	8.64	0.73	8.61	4.67	11.17	13629	11.87	8.42	2.39
BCAP31	9.71	0.82	9.75	4.23	12.86	13629	11.87	8.43	3.04
SMBP	9.24	0.78	9.25	4.74	12.96	13629	11.87	8.43	2.73
ZNF278	6.68	0.56	6.67	4.20	10.02	13629	11.86	8.43	2.38
DPP8	8.94	0.75	8.95	3.41	12.10	13629	11.86	8.43	3.55
MRPS10	8.25	0.70	8.27	2.76	11.04	13629	11.86	8.43	4.00
ATP5S	6.85	0.58	6.87	4.61	9.11	13629	11.86	8.43	1.97
SSH1	7.88	0.66	7.86	4.50	10.97	13629	11.86	8.43	2.44
C6orf48	10.13	0.85	10.09	6.62	12.87	13629	11.86	8.43	1.94
GRSF1	7.91	0.67	7.96	4.86	10.44	13629	11.86	8.43	2.15
PRPF18	6.82	0.58	6.87	4.00	9.10	13629	11.85	8.44	2.28
ALDH9A1	9.49	0.80	9.49	5.13	12.88	13629	11.85	8.44	2.51
GTPBP6	7.81	0.66	7.80	3.84	11.29	13629	11.85	8.44	2.94
PSME3	8.05	0.68	8.03	4.69	10.95	13629	11.85	8.44	2.34
PMVK	7.96	0.67	7.96	3.88	10.79	13629	11.85	8.44	2.78
CHMP7	7.71	0.65	7.68	3.38	10.92	13629	11.84	8.44	3.23
TRIT1	7.71	0.65	7.69	3.81	12.18	13629	11.84	8.45	3.19
POLR2H	9.13	0.77	9.15	5.55	12.67	13629	11.84	8.45	2.28
M-RIP	9.04	0.76	9.03	5.55	11.86	13629	11.84	8.45	2.14
FBXO28	8.00	0.68	8.06	4.76	10.62	13629	11.84	8.45	2.23
U2AF2	7.44	0.63	7.45	5.05	10.05	13629	11.83	8.45	1.99
NME2	11.02	0.93	11.14	4.15	13.82	13629	11.83	8.45	3.33
RPA2	8.79	0.74	8.84	3.83	11.24	13629	11.83	8.45	2.94
NDUFV2	9.79	0.83	9.79	3.89	12.68	13629	11.83	8.45	3.26
C8orf41	7.07	0.60	7.12	2.30	10.16	13629	11.82	8.46	4.41
KIAA0804	7.54	0.64	7.51	2.37	10.86	13629	11.82	8.46	4.59
WBP11	8.41	0.71	8.43	3.89	12.01	13629	11.82	8.46	3.08
MOSPD3	7.41	0.63	7.39	3.14	9.99	13629	11.82	8.46	3.19
HARSL	7.75	0.66	7.81	3.19	10.56	13629	11.82	8.46	3.32
C2orf17	8.27	0.70	8.28	5.56	11.74	13629	11.82	8.46	2.11
EIF4ENIF1	7.48	0.63	7.52	2.66	9.47	13629	11.82	8.46	3.57
TUG1	10.02	0.85	10.10	2.44	12.29	13629	11.82	8.46	5.04
SAE1	8.89	0.75	8.85	5.19	11.88	13629	11.82	8.46	2.29
PI4KII	6.83	0.58	6.83	3.10	9.44	13629	11.81	8.47	3.05
FLJ12436	7.79	0.66	7.77	2.82	10.46	13629	11.81	8.47	3.71
RUSC1	8.72	0.74	8.71	4.81	11.57	13629	11.81	8.47	2.41
ZNF133	6.86	0.58	6.89	3.04	10.77	13629	11.80	8.47	3.54
DNAJC11	7.82	0.66	7.84	3.20	10.39	13629	11.80	8.47	3.24
USP25	8.47	0.72	8.44	4.28	11.13	13629	11.80	8.47	2.60
PMPCA	8.04	0.68	8.08	2.83	10.66	13629	11.79	8.48	3.77
RBM15B	8.11	0.69	8.15	4.09	10.68	13629	11.79	8.48	2.61
FAM45B	9.16	0.78	9.16	2.80	12.83	13629	11.79	8.48	4.57
ECHS1	9.93	0.84	10.02	3.34	12.94	13629	11.79	8.48	3.88
DDX56	7.93	0.67	7.95	2.64	10.41	13629	11.79	8.48	3.94
ASXL2	9.27	0.79	9.25	5.48	11.56	13629	11.79	8.48	2.11
SRP72	8.69	0.74	8.76	5.26	11.48	13629	11.79	8.48	2.18
PRKAR1A	9.89	0.84	9.98	5.14	12.27	13629	11.79	8.48	2.39
BAZ2A	6.85	0.58	6.86	2.81	9.47	13629	11.78	8.49	3.37
MOSPD2	7.19	0.61	7.17	4.03	10.01	13629	11.78	8.49	2.48
ZNF500	6.29	0.53	6.26	2.91	9.36	13629	11.78	8.49	3.22
LYPLA2	8.15	0.69	8.21	5.67	10.86	13629	11.77	8.49	1.91
CMPK	9.49	0.81	9.58	3.82	12.58	13629	11.77	8.50	3.29
RAP140	7.82	0.66	7.84	4.25	10.44	13629	11.76	8.50	2.46
STAG1	7.53	0.64	7.56	3.22	9.80	13629	11.76	8.50	3.05
SIRT5	5.85	0.50	5.82	3.92	8.62	13629	11.76	8.50	2.20
SLC41A3	7.77	0.66	7.75	2.35	10.26	13629	11.76	8.50	4.36
CYHR1	6.30	0.54	6.30	3.26	8.45	13629	11.76	8.50	2.59
HNRPU	9.24	0.79	9.38	5.96	11.39	13629	11.76	8.50	1.91
FXC1	7.23	0.62	7.23	3.45	9.87	13629	11.76	8.50	2.86
SAMM50	8.38	0.71	8.36	3.67	11.96	13629	11.76	8.51	3.26
SFRS2IP	8.67	0.74	8.73	5.39	11.30	13629	11.75	8.51	2.10
DNCH1	9.50	0.81	9.56	4.46	12.50	13629	11.75	8.51	2.81
CUL1	8.35	0.71	8.43	2.40	11.03	13629	11.75	8.51	4.60
NAP1L4	7.07	0.60	7.13	4.63	9.87	13629	11.75	8.51	2.13
C20orf3	9.74	0.83	9.77	4.94	12.98	13629	11.75	8.51	2.62
NCOA6IP	7.27	0.62	7.26	2.37	10.26	13629	11.74	8.51	4.34
PIGL	6.74	0.57	6.77	3.79	11.20	13629	11.74	8.52	2.96
FTSJ2	7.79	0.66	7.80	3.60	10.32	13629	11.74	8.52	2.87
OIP106	7.42	0.63	7.39	4.07	10.96	13629	11.74	8.52	2.70
MAT2A	8.61	0.73	8.63	5.12	12.64	13629	11.73	8.52	2.47
MRPL48	8.22	0.70	8.24	3.08	10.96	13629	11.73	8.53	3.55
DLGAP4	6.78	0.58	6.78	4.06	9.28	13629	11.73	8.53	2.28
HMGN1	10.97	0.94	11.13	6.63	13.56	13629	11.73	8.53	2.05
RPL31	11.23	0.96	11.53	7.64	12.99	13629	11.73	8.53	1.70
PHF8	6.20	0.53	6.15	2.85	8.54	13629	11.73	8.53	3.00
B4GALT7	6.80	0.58	6.84	3.08	10.31	13629	11.73	8.53	3.35
NFYC	7.41	0.63	7.36	3.70	11.38	13629	11.73	8.53	3.07
DKFZP586P0123	7.09	0.60	7.12	3.60	9.85	13629	11.72	8.53	2.74
RAB21	8.52	0.73	8.51	2.96	12.07	13629	11.72	8.53	4.07
NBLA00058	8.42	0.72	8.47	2.45	10.97	13629	11.72	8.53	4.47
GOSR2	6.45	0.55	6.45	3.78	8.79	13629	11.72	8.54	2.32
KIAA0141	7.19	0.61	7.19	4.23	9.56	13629	11.71	8.54	2.26
FLJ10099	8.88	0.76	8.99	3.09	11.55	13629	11.70	8.54	3.74
ZBTB40	7.07	0.60	7.08	2.78	9.96	13629	11.70	8.55	3.58
UBE2D2	8.16	0.70	8.23	5.79	11.62	13629	11.70	8.55	2.01
GLT25D1	8.59	0.73	8.56	4.94	11.96	13629	11.69	8.55	2.42
MPZL1	7.69	0.66	7.69	5.42	10.38	13629	11.69	8.56	1.92
GORASP1	7.40	0.63	7.42	3.02	9.62	13629	11.68	8.56	3.19
THRAP5	6.89	0.59	6.93	4.14	9.88	13629	11.68	8.56	2.39
SCAMP2	8.81	0.75	8.81	4.64	12.01	13629	11.68	8.56	2.59
TMCO1	8.61	0.74	8.65	3.39	11.74	13629	11.68	8.56	3.46
C18orf8	7.64	0.65	7.58	3.60	10.62	13629	11.68	8.56	2.95
FNBP4	8.71	0.75	8.69	2.80	11.73	13629	11.68	8.56	4.19
LETMD1	8.53	0.73	8.57	2.91	10.79	13629	11.68	8.56	3.71
C14orf32	9.11	0.78	9.18	6.09	12.03	13629	11.68	8.56	1.97
DKFZp564J157	9.58	0.82	9.58	4.19	12.09	13629	11.67	8.57	2.89
C4orf8	8.05	0.69	8.06	2.87	11.01	13629	11.67	8.57	3.84
LUC7L	7.27	0.62	7.26	3.22	9.99	13629	11.67	8.57	3.10
ITM2B	11.04	0.95	11.12	3.08	13.73	13629	11.67	8.57	4.45
ITGB1BP1	7.70	0.66	7.68	3.85	11.11	13629	11.67	8.57	2.89
FLJ20551	7.89	0.68	7.90	3.16	11.01	13629	11.67	8.57	3.49
TBC1D22A	7.28	0.62	7.23	4.29	9.92	13629	11.66	8.57	2.31
SDF4	8.64	0.74	8.67	3.32	11.77	13629	11.66	8.58	3.54
FLJ20254	8.37	0.72	8.37	4.22	10.92	13629	11.66	8.58	2.59
LRRC40	7.67	0.66	7.61	4.80	11.23	13629	11.66	8.58	2.34
WBSCR22	9.10	0.78	9.08	6.24	11.89	13629	11.65	8.58	1.91
RAB14	8.09	0.69	8.19	4.38	10.34	13629	11.65	8.58	2.36
PLEKHB2	8.70	0.75	8.74	5.23	11.71	13629	11.65	8.58	2.24
CDK5RAP1	7.74	0.66	7.72	3.97	11.05	13629	11.65	8.58	2.78
WWP2	7.30	0.63	7.24	4.85	10.96	13629	11.65	8.58	2.26
MAP1LC3B	9.30	0.80	9.32	3.88	12.22	13629	11.65	8.59	3.15
TAF6	8.28	0.71	8.32	3.51	10.92	13629	11.65	8.59	3.11
DGCR14	6.48	0.56	6.46	4.38	10.01	13629	11.64	8.59	2.28
ACTR5	6.71	0.58	6.70	3.20	10.20	13629	11.64	8.59	3.18
KIAA0196	7.90	0.68	7.90	2.46	12.12	13629	11.63	8.60	4.92
PITRM1	8.38	0.72	8.39	2.77	12.04	13629	11.63	8.60	4.35
PCGF3	7.20	0.62	7.22	4.16	9.86	13629	11.63	8.60	2.37
TLOC1	9.59	0.82	9.56	5.86	12.84	13629	11.62	8.60	2.19
NDUFC1	10.24	0.88	10.35	4.20	12.38	13629	11.62	8.61	2.95
ATP13A1	8.04	0.69	8.09	3.71	11.09	13629	11.62	8.61	2.99
FLJ10774	8.47	0.73	8.44	4.78	13.04	13629	11.62	8.61	2.73
GGA1	8.91	0.77	8.90	5.96	12.99	13629	11.61	8.61	2.18
FLJ20628	7.59	0.65	7.63	2.43	11.84	13629	11.61	8.61	4.87
SMAP-1	7.50	0.65	7.45	4.65	10.79	13629	11.61	8.61	2.32
TSPAN31	8.18	0.71	8.21	3.87	12.59	13629	11.61	8.62	3.26
TH1L	9.23	0.80	9.21	2.89	11.99	13629	11.61	8.62	4.15
ARFGAP1	7.84	0.68	7.82	4.88	11.71	13629	11.60	8.62	2.40
GGCX	6.89	0.59	6.90	4.56	9.80	13629	11.60	8.62	2.15
EFTUD1	7.65	0.66	7.68	2.51	10.61	13629	11.60	8.62	4.22
KLHL18	6.88	0.59	6.90	4.02	9.66	13629	11.60	8.62	2.40
CPSF4	8.36	0.72	8.37	3.28	11.11	13629	11.60	8.62	3.39
RBX1	9.50	0.82	9.62	3.87	12.71	13629	11.59	8.62	3.28
TRAF3	6.89	0.59	6.90	3.55	9.43	13629	11.59	8.63	2.66
MDH1	10.85	0.94	10.79	4.70	13.90	13629	11.59	8.63	2.96
BZW1	9.55	0.82	9.62	5.71	12.51	13629	11.59	8.63	2.19
MTCH2	9.36	0.81	9.38	3.97	12.57	13629	11.59	8.63	3.17
PBX2	6.92	0.60	6.91	3.82	9.84	13629	11.58	8.63	2.58
MED12	7.03	0.61	7.07	3.50	9.48	13629	11.58	8.63	2.70
POLR3E	8.16	0.70	8.20	3.05	11.61	13629	11.58	8.63	3.80
WDR68	7.31	0.63	7.29	4.82	10.59	13629	11.58	8.63	2.20
IQCB1	7.72	0.67	7.64	2.93	10.45	13629	11.58	8.63	3.57
TEX10	8.00	0.69	7.94	5.63	11.28	13629	11.58	8.64	2.00
OAZ2	8.68	0.75	8.73	4.81	11.23	13629	11.58	8.64	2.34
RASA1	8.69	0.75	8.72	4.93	12.96	13629	11.57	8.64	2.63
FAM50A	8.49	0.73	8.52	3.45	11.86	13629	11.57	8.64	3.44
MBTPS1	8.14	0.70	8.19	3.62	10.66	13629	11.57	8.65	2.94
LOC127406	7.90	0.68	7.88	3.80	10.99	13629	11.57	8.65	2.90
PDIA6	10.15	0.88	10.18	6.71	12.91	13629	11.56	8.65	1.92
TUBB	11.28	0.98	11.34	6.91	13.73	13629	11.56	8.65	1.99
UBE2D4	7.52	0.65	7.45	3.68	10.75	13629	11.56	8.65	2.92
IFNGR2	9.57	0.83	9.58	3.17	12.51	13629	11.56	8.65	3.95
DSCR5	8.99	0.78	8.97	3.95	11.95	13629	11.56	8.65	3.02
KIAA0310	8.92	0.77	8.92	4.25	11.93	13629	11.56	8.65	2.81
RXRB	6.70	0.58	6.76	3.38	9.13	13629	11.55	8.65	2.70
APPBP1	9.19	0.80	9.23	3.10	11.83	13629	11.55	8.66	3.81
RNPEP	8.93	0.77	8.99	5.67	12.03	13629	11.55	8.66	2.12
NUDT3	7.96	0.69	7.88	5.46	10.74	13629	11.55	8.66	1.97
MAP2K1IP1	8.48	0.73	8.52	3.84	11.21	13629	11.55	8.66	2.92
SMAP1	8.41	0.73	8.46	2.50	11.08	13629	11.55	8.66	4.43
PAFAH2	5.98	0.52	5.96	2.79	9.54	13629	11.54	8.66	3.42
SKIV2L	8.11	0.70	8.20	4.13	10.74	13629	11.54	8.66	2.60
C12orf4	7.06	0.61	7.11	2.27	9.83	13629	11.54	8.67	4.33
LSM6	8.09	0.70	8.05	3.90	11.07	13629	11.54	8.67	2.84
SRPK1	8.21	0.71	8.19	5.86	11.01	13629	11.54	8.67	1.88
MGC11308	7.73	0.67	7.77	2.62	10.24	13629	11.54	8.67	3.91
GLUD1	8.78	0.76	8.82	4.03	11.80	13629	11.53	8.67	2.93
CXXC1	8.73	0.76	8.74	2.46	11.58	13629	11.53	8.67	4.71
CAMLG	9.00	0.78	9.00	5.56	11.90	13629	11.52	8.68	2.14
PDHB	9.19	0.80	9.22	3.69	11.60	13629	11.52	8.68	3.14
ACADVL	9.59	0.83	9.55	4.78	12.88	13629	11.52	8.68	2.69
UBE1	10.35	0.90	10.46	2.98	14.03	13629	11.52	8.68	4.70
TAF5L	7.63	0.66	7.60	3.54	10.11	13629	11.52	8.68	2.86
RBM5	8.31	0.72	8.29	5.12	10.78	13629	11.52	8.68	2.11
WDR61	8.04	0.70	8.09	3.82	11.72	13629	11.52	8.68	3.07
FLAD1	7.24	0.63	7.24	3.98	9.88	13629	11.51	8.69	2.48
TUSC2	7.44	0.65	7.38	3.98	10.19	13629	11.51	8.69	2.56
MDS025	8.52	0.74	8.56	3.35	11.25	13629	11.51	8.69	3.36
RAN	10.11	0.88	10.13	4.92	12.18	13629	11.51	8.69	2.48
G3BP2	8.32	0.72	8.39	5.12	10.86	13629	11.51	8.69	2.12
RC74	7.44	0.65	7.45	2.36	9.67	13629	11.50	8.69	4.09
KRT10	9.39	0.82	9.37	6.39	13.73	13629	11.50	8.69	2.15
TTC11	9.46	0.82	9.54	3.38	12.22	13629	11.50	8.69	3.62
DCTN5	7.49	0.65	7.44	4.02	9.98	13629	11.50	8.70	2.48
USP33	7.69	0.67	7.68	4.82	10.55	13629	11.50	8.70	2.19
TEX27	8.54	0.74	8.57	5.17	11.22	13629	11.50	8.70	2.17
BRF2	7.20	0.63	7.19	4.12	11.26	13629	11.49	8.70	2.73
FLJ22555	8.24	0.72	8.31	2.43	10.38	13629	11.49	8.70	4.27
GSS	8.27	0.72	8.28	4.93	11.86	13629	11.49	8.71	2.41
SMARCC1	7.89	0.69	7.93	5.11	10.37	13629	11.48	8.71	2.03
RNF7	8.31	0.72	8.35	3.81	11.17	13629	11.48	8.71	2.93
RALBP1	8.09	0.70	8.13	3.94	11.60	13629	11.48	8.71	2.95
NXF1	8.84	0.77	8.77	4.38	12.27	13629	11.48	8.71	2.80
TCEB3	7.46	0.65	7.42	4.56	10.68	13629	11.48	8.71	2.34
HSPC023	9.52	0.83	9.65	3.14	12.92	13629	11.48	8.71	4.11
MAX	8.09	0.70	8.02	5.18	11.07	13629	11.48	8.71	2.14
BRD2	9.18	0.80	9.17	4.05	12.36	13629	11.48	8.71	3.05
YIPF6	7.46	0.65	7.50	4.63	12.54	13629	11.47	8.72	2.71
RABL4	7.01	0.61	7.08	2.85	10.14	13629	11.47	8.72	3.56
PSME4	7.73	0.67	7.70	4.84	11.44	13629	11.47	8.72	2.36
TBP	7.31	0.64	7.32	2.59	10.63	13629	11.47	8.72	4.11
GOLGA3	8.02	0.70	8.05	3.09	10.54	13629	11.46	8.72	3.41
FLOT1	8.84	0.77	8.83	3.77	11.74	13629	11.46	8.72	3.12
NENF	7.14	0.62	7.12	5.08	10.59	13629	11.46	8.72	2.09
SUPV3L1	7.60	0.66	7.59	2.79	10.56	13629	11.46	8.72	3.79
YARS	9.23	0.81	9.21	5.10	11.99	13629	11.46	8.73	2.35
C14orf131	6.41	0.56	6.41	3.02	9.01	13629	11.46	8.73	2.99
CACYBP	8.55	0.75	8.53	6.36	11.88	13629	11.46	8.73	1.87
GGPS1	7.74	0.68	7.73	4.69	11.54	13629	11.45	8.73	2.46
RALY	8.22	0.72	8.26	2.60	11.14	13629	11.45	8.73	4.29
FLJ21865	8.02	0.70	7.97	5.72	11.13	13629	11.45	8.73	1.95
DND1	7.24	0.63	7.21	2.46	11.22	13629	11.45	8.74	4.56
RYK	7.62	0.67	7.67	4.50	10.73	13629	11.45	8.74	2.38
LOC58486	8.81	0.77	8.85	2.77	11.92	13629	11.45	8.74	4.31
GTF3C1	8.17	0.71	8.20	4.42	11.30	13629	11.45	8.74	2.56
AGGF1	6.67	0.58	6.76	3.71	8.99	13629	11.44	8.74	2.42
RAD21	9.19	0.80	9.25	4.82	12.48	13629	11.44	8.74	2.59
MARS	8.38	0.73	8.37	5.94	12.06	13629	11.44	8.74	2.03
KIAA0268	7.50	0.66	7.44	3.61	10.89	13629	11.44	8.74	3.02
SPSB3	8.45	0.74	8.43	5.04	12.56	13629	11.44	8.74	2.49
ENSA	9.01	0.79	9.02	2.17	12.05	13629	11.43	8.75	5.55
C1orf107	6.78	0.59	6.86	4.43	9.71	13629	11.43	8.75	2.19
UBN1	7.81	0.68	7.73	5.36	11.44	13629	11.43	8.75	2.13
MAPKAP1	7.69	0.67	7.71	3.13	10.66	13629	11.43	8.75	3.40
SNRPE	10.47	0.92	10.55	3.53	12.96	13629	11.43	8.75	3.67
CALR	9.17	0.80	9.14	5.52	12.95	13629	11.43	8.75	2.35
RAB3GAP2	7.45	0.65	7.51	3.17	10.27	13629	11.43	8.75	3.24
CTGLF1	8.31	0.73	8.32	2.41	11.42	13629	11.42	8.75	4.73
TXNDC9	8.83	0.77	8.90	4.95	11.53	13629	11.42	8.75	2.33
FKBP1A	8.98	0.79	8.98	5.84	12.17	13629	11.42	8.75	2.08
AKR7A2	8.53	0.75	8.55	4.38	12.23	13629	11.42	8.76	2.80
TMED2	9.67	0.85	9.76	5.18	12.87	13629	11.41	8.76	2.48
RSL1D1	7.81	0.68	7.80	3.64	10.54	13629	11.41	8.77	2.89
ARHGEF7	8.07	0.71	8.04	2.79	12.86	13629	11.40	8.77	4.61
MRPL3	10.15	0.89	10.26	3.49	12.32	13629	11.40	8.77	3.53
NUBP1	7.41	0.65	7.44	2.56	9.94	13629	11.40	8.77	3.88
PLEKHJ1	8.14	0.71	8.11	4.85	11.67	13629	11.40	8.77	2.40
MPHOSPH6	8.56	0.75	8.55	4.25	12.14	13629	11.40	8.77	2.85
COQ7	6.68	0.59	6.68	3.08	8.63	13629	11.40	8.78	2.80
GGA3	7.21	0.63	7.18	2.90	9.88	13629	11.39	8.78	3.41
FLJ10826	7.67	0.67	7.68	2.44	10.59	13629	11.39	8.78	4.34
MRPS30	7.84	0.69	7.79	3.41	12.03	13629	11.39	8.78	3.53
MAN1B1	7.37	0.65	7.34	3.86	10.56	13629	11.38	8.79	2.74
GPS2	8.20	0.72	8.26	2.66	10.81	13629	11.38	8.79	4.07
PDHA1	9.47	0.83	9.38	6.05	12.41	13629	11.38	8.79	2.05
ERP29	10.11	0.89	10.18	5.07	13.09	13629	11.38	8.79	2.58
LOC91137	8.39	0.74	8.42	2.94	12.37	13629	11.38	8.79	4.20
FLJ13149	7.63	0.67	7.61	3.09	9.82	13629	11.37	8.79	3.18
RBM16	8.65	0.76	8.71	2.60	11.56	13629	11.37	8.79	4.45
NACAP1	10.34	0.91	10.29	6.68	13.82	13629	11.37	8.79	2.07
TCTEL1	10.23	0.90	10.33	5.89	13.10	13629	11.37	8.80	2.23
GMEB2	7.84	0.69	7.81	4.49	11.53	13629	11.37	8.80	2.57
FLJ20291	7.43	0.65	7.41	2.83	10.88	13629	11.37	8.80	3.85
NAGA	7.41	0.65	7.33	4.58	10.71	13629	11.37	8.80	2.34
PSMD11	8.41	0.74	8.43	4.19	11.26	13629	11.37	8.80	2.69
PARN	8.37	0.74	8.34	2.51	11.98	13629	11.37	8.80	4.77
MYST2	8.22	0.72	8.19	5.26	11.48	13629	11.36	8.80	2.18
PHF20	7.44	0.65	7.38	2.18	10.57	13629	11.36	8.80	4.84
HSPC171	8.50	0.75	8.50	5.30	11.12	13629	11.36	8.80	2.10
MEA1	9.27	0.82	9.34	3.62	13.22	13629	11.36	8.80	3.65
IDH3G	8.18	0.72	8.22	3.81	10.36	13629	11.36	8.80	2.72
ATXN2	7.36	0.65	7.33	3.26	10.64	13629	11.36	8.80	3.26
ALG6	8.09	0.71	8.15	3.69	11.37	13629	11.36	8.81	3.08
FALZ	8.30	0.73	8.30	4.22	11.08	13629	11.36	8.81	2.62
GPI7	8.47	0.75	8.51	3.31	11.58	13629	11.36	8.81	3.50
MRPL9	8.53	0.75	8.56	3.28	12.09	13629	11.35	8.81	3.69
POP5	8.76	0.77	8.79	2.35	11.45	13629	11.35	8.81	4.87
HTRA2	7.61	0.67	7.58	3.85	10.99	13629	11.35	8.81	2.85
C1orf50	6.76	0.60	6.80	3.25	9.79	13629	11.35	8.81	3.02
SKIP	7.33	0.65	7.30	3.60	10.11	13629	11.35	8.81	2.81
TCOF1	6.90	0.61	6.92	3.87	9.59	13629	11.34	8.82	2.48
MCM3AP	6.58	0.58	6.65	4.22	9.36	13629	11.34	8.82	2.22
ADRM1	9.02	0.80	9.03	2.74	13.14	13629	11.34	8.82	4.79
PJA1	8.33	0.73	8.29	2.93	11.49	13629	11.34	8.82	3.92
DNASE2	7.94	0.70	7.89	4.03	11.01	13629	11.33	8.82	2.73
NPEPPS	7.83	0.69	7.85	3.90	10.67	13629	11.33	8.83	2.74
CHMP2A	9.24	0.82	9.33	3.09	12.83	13629	11.33	8.83	4.16
NUP133	8.26	0.73	8.29	2.98	10.92	13629	11.33	8.83	3.67
LRRC8D	8.58	0.76	8.62	3.05	11.74	13629	11.32	8.83	3.84
RFP2	7.83	0.69	7.79	4.16	11.74	13629	11.32	8.84	2.82
PAIP1	8.41	0.74	8.51	4.04	11.37	13629	11.32	8.84	2.81
U2AF1L2	7.84	0.69	7.81	4.40	11.11	13629	11.32	8.84	2.53
SLC38A2	10.53	0.93	10.59	4.47	13.28	13629	11.32	8.84	2.97
AP2S1	9.59	0.85	9.60	4.74	12.20	13629	11.31	8.84	2.57
KIAA1002	8.72	0.77	8.71	3.90	13.73	13629	11.31	8.84	3.52
PFKL	8.31	0.73	8.33	4.28	11.01	13629	11.31	8.84	2.57
SURF5	7.08	0.63	7.15	2.53	9.57	13629	11.31	8.84	3.78
APTX	7.61	0.67	7.67	2.32	10.39	13629	11.31	8.84	4.48
FLII	8.22	0.73	8.26	3.25	11.19	13629	11.31	8.84	3.45
FLJ21827	7.70	0.68	7.69	2.72	10.39	13629	11.31	8.84	3.82
LANCL1	8.23	0.73	8.19	2.66	12.12	13629	11.30	8.85	4.57
RAI16	7.43	0.66	7.38	2.42	10.26	13629	11.30	8.85	4.23
C14orf11	8.32	0.74	8.37	2.61	11.07	13629	11.30	8.85	4.25
ZNF16	6.68	0.59	6.72	2.54	8.96	13629	11.30	8.85	3.53
RAB5A	8.43	0.75	8.54	5.48	10.86	13629	11.30	8.85	1.98
DPM2	7.54	0.67	7.51	2.81	12.40	13629	11.30	8.85	4.41
STK24	9.22	0.82	9.28	5.05	12.08	13629	11.30	8.85	2.39
TMEM66	10.48	0.93	10.52	6.89	13.28	13629	11.30	8.85	1.93
SSR4	10.89	0.96	10.91	5.66	14.03	13629	11.29	8.86	2.48
VPS13D	6.77	0.60	6.75	2.61	10.79	13629	11.29	8.86	4.14
CKAP1	9.33	0.83	9.38	4.58	12.59	13629	11.29	8.86	2.75
PEF1	8.58	0.76	8.64	3.00	11.08	13629	11.29	8.86	3.69
TOMM34	8.45	0.75	8.49	4.36	11.49	13629	11.29	8.86	2.64
HSD17B7	8.27	0.73	8.26	4.78	11.99	13629	11.29	8.86	2.51
RAB11FIP5	7.52	0.67	7.48	2.98	10.66	13629	11.29	8.86	3.57
ICMT	7.40	0.66	7.35	4.19	10.08	13629	11.28	8.86	2.40
THADA	7.15	0.63	7.20	3.18	11.36	13629	11.28	8.86	3.58
LMBRD1	9.54	0.85	9.59	5.63	12.04	13629	11.28	8.86	2.14
KIAA0194	7.69	0.68	7.55	4.22	10.40	13629	11.28	8.87	2.46
CDC2L1	7.30	0.65	7.26	4.39	10.07	13629	11.28	8.87	2.30
NDEL1	8.40	0.75	8.33	4.81	12.06	13629	11.28	8.87	2.51
CALM1	9.88	0.88	9.84	6.38	13.02	13629	11.27	8.87	2.04
CCNG1	9.84	0.87	9.87	2.83	12.41	13629	11.27	8.87	4.39
CBFA2T2	6.28	0.56	6.31	3.14	9.48	13629	11.27	8.88	3.02
NOL11	8.81	0.78	8.76	4.56	11.50	13629	11.26	8.88	2.52
MGC2654	7.25	0.64	7.22	3.97	10.23	13629	11.26	8.88	2.58
ATG4A	7.57	0.67	7.50	2.75	12.56	13629	11.26	8.88	4.57
C5orf15	9.08	0.81	9.13	2.54	12.47	13629	11.26	8.88	4.91
UBE2G1	8.80	0.78	8.77	3.94	12.00	13629	11.26	8.88	3.04
FLJ14668	8.44	0.75	8.45	4.15	11.12	13629	11.25	8.89	2.68
PSMD10	8.97	0.80	9.08	3.45	14.03	13629	11.25	8.89	4.07
ADPGK	9.13	0.81	9.11	4.84	12.16	13629	11.25	8.89	2.51
TRAM1	10.13	0.90	10.17	6.10	12.87	13629	11.25	8.89	2.11
SFRS6	8.91	0.79	8.88	6.25	13.09	13629	11.25	8.89	2.10
BUB3	9.24	0.82	9.32	5.91	12.95	13629	11.24	8.89	2.19
HDAC6	6.98	0.62	7.01	4.23	9.51	13629	11.24	8.90	2.25
C8orf30A	8.08	0.72	8.13	4.15	12.00	13629	11.24	8.90	2.89
C5orf18	9.58	0.85	9.63	4.74	12.50	13629	11.24	8.90	2.64
PSMA7	9.53	0.85	9.56	3.38	12.64	13629	11.23	8.90	3.74
MRPS7	8.52	0.76	8.47	3.09	11.88	13629	11.23	8.90	3.85
H2AFZ	10.76	0.96	10.81	6.46	13.31	13629	11.23	8.90	2.06
STX16	8.15	0.73	8.15	5.24	11.41	13629	11.23	8.90	2.18
THAP7	7.26	0.65	7.28	2.14	10.21	13629	11.23	8.91	4.77
PSMA5	9.41	0.84	9.45	4.25	12.32	13629	11.23	8.91	2.90
RPP14	7.48	0.67	7.43	2.28	10.31	13629	11.22	8.91	4.53
L3MBTL	5.54	0.49	5.52	3.43	7.87	13629	11.22	8.91	2.29
GBF1	7.46	0.66	7.43	2.62	9.88	13629	11.22	8.91	3.77
FLJ20850	7.86	0.70	7.83	4.22	10.83	13629	11.22	8.91	2.56
SFRS1	8.98	0.80	9.03	5.69	12.11	13629	11.22	8.91	2.13
RANBP9	8.54	0.76	8.58	4.89	11.56	13629	11.22	8.91	2.36
SCMH1	7.61	0.68	7.58	2.60	10.37	13629	11.21	8.92	3.99
XPO7	7.81	0.70	7.86	3.58	12.19	13629	11.21	8.92	3.40
SPEN	8.19	0.73	8.18	5.42	11.58	13629	11.21	8.92	2.14
GON4	6.95	0.62	7.03	4.66	9.30	13629	11.21	8.92	2.00
MRPS14	7.98	0.71	8.06	4.68	10.57	13629	11.21	8.92	2.26
DARS	9.11	0.81	9.15	4.06	11.56	13629	11.21	8.92	2.85
ARMCX6	9.80	0.87	9.80	2.78	13.34	13629	11.21	8.92	4.81
WIZ	6.67	0.60	6.67	2.56	11.10	13629	11.20	8.92	4.33
BTBD1	9.31	0.83	9.32	2.38	12.32	13629	11.20	8.93	5.17
ERCC3	7.40	0.66	7.45	2.78	9.35	13629	11.20	8.93	3.36
COMMD3	9.22	0.82	9.17	4.65	13.82	13629	11.20	8.93	2.97
NDUFA13	10.20	0.91	10.33	2.45	12.89	13629	11.20	8.93	5.27
SMARCD1	7.24	0.65	7.22	4.39	9.62	13629	11.20	8.93	2.19
C18orf22	6.66	0.59	6.68	3.55	8.85	13629	11.20	8.93	2.49
MORC2	7.55	0.67	7.51	3.41	12.30	13629	11.20	8.93	3.61
ZNF277	6.92	0.62	6.97	3.27	9.79	13629	11.20	8.93	2.99
C1orf144	7.71	0.69	7.69	4.88	9.93	13629	11.20	8.93	2.03
DDX49	7.18	0.64	7.17	4.16	10.59	13629	11.20	8.93	2.55
MLF2	9.27	0.83	9.33	5.15	12.68	13629	11.19	8.93	2.46
DKFZP564G2022	8.86	0.79	8.85	3.93	11.85	13629	11.19	8.93	3.02
MLH3	6.63	0.59	6.67	4.32	10.55	13629	11.19	8.94	2.44
FLJ10707	9.17	0.82	9.25	3.17	12.79	13629	11.19	8.94	4.03
PHKA2	7.00	0.63	7.01	3.09	10.20	13629	11.19	8.94	3.30
OXA1L	9.27	0.83	9.34	3.39	11.73	13629	11.19	8.94	3.46
Cep164	6.22	0.56	6.23	2.89	9.51	13629	11.18	8.94	3.29
SNAPC5	8.45	0.76	8.48	2.93	11.90	13629	11.18	8.94	4.06
PQBP1	7.50	0.67	7.49	4.40	10.62	13629	11.18	8.95	2.41
FUS	8.19	0.73	8.20	5.57	11.55	13629	11.17	8.95	2.07
FBXW11	7.53	0.67	7.50	3.96	11.05	13629	11.17	8.95	2.79
MTDH	9.30	0.83	9.27	5.75	12.80	13629	11.17	8.95	2.23
POLR2E	8.32	0.74	8.35	4.75	10.90	13629	11.17	8.95	2.29
COPS7A	8.43	0.76	8.51	3.12	11.64	13629	11.16	8.96	3.73
HRMT1L1	7.31	0.65	7.31	4.67	9.64	13629	11.16	8.96	2.06
GALNT1	8.69	0.78	8.70	4.37	11.94	13629	11.16	8.96	2.74
D15Wsu75e	7.38	0.66	7.37	3.98	9.80	13629	11.16	8.96	2.46
C1orf60	7.27	0.65	7.24	4.38	11.41	13629	11.16	8.96	2.61
FLJ20534	8.29	0.74	8.33	2.25	11.31	13629	11.16	8.96	5.02
CASC3	8.53	0.76	8.48	4.72	12.96	13629	11.16	8.96	2.75
HS1BP3	7.77	0.70	7.78	2.29	11.77	13629	11.16	8.96	5.13
KIAA0404	7.83	0.70	7.76	4.35	12.03	13629	11.16	8.96	2.77
KIAA0274	7.87	0.71	7.83	3.15	12.51	13629	11.15	8.96	3.97
KIF5B	9.33	0.84	9.38	5.05	12.43	13629	11.15	8.97	2.46
QP-C	10.90	0.98	11.04	5.34	13.61	13629	11.15	8.97	2.55
NME6	6.91	0.62	7.00	2.79	9.37	13629	11.15	8.97	3.36
SATL1	7.09	0.64	7.13	2.48	9.54	13629	11.15	8.97	3.84
TBC1D10B	8.46	0.76	8.60	3.91	11.38	13629	11.15	8.97	2.91
PDCD6	7.43	0.67	7.37	5.23	10.63	13629	11.15	8.97	2.03
ADSL	9.01	0.81	8.96	5.95	11.67	13629	11.15	8.97	1.96
KIAA1040	8.03	0.72	8.12	3.14	11.05	13629	11.15	8.97	3.52
COPB2	9.33	0.84	9.40	3.38	12.67	13629	11.15	8.97	3.75
R3HDM1	7.49	0.67	7.44	4.42	10.96	13629	11.15	8.97	2.48
FRAG1	7.49	0.67	7.51	2.47	9.75	13629	11.14	8.97	3.94
SDCBP	10.68	0.96	10.72	5.01	13.90	13629	11.14	8.98	2.77
RNUT1	7.90	0.71	7.97	2.44	11.58	13629	11.14	8.98	4.75
CBFB	8.74	0.78	8.73	5.93	11.81	13629	11.13	8.98	1.99
NOSIP	8.37	0.75	8.27	4.67	11.96	13629	11.12	8.99	2.56
DALRD3	7.26	0.65	7.22	3.46	10.50	13629	11.12	8.99	3.04
C1orf160	8.14	0.73	8.23	3.78	10.78	13629	11.12	9.00	2.85
WBSCR16	7.84	0.70	7.87	3.19	10.14	13629	11.12	9.00	3.18
LMBR1L	7.37	0.66	7.32	3.17	10.47	13629	11.12	9.00	3.30
SLC25A20	7.99	0.72	7.97	3.72	10.96	13629	11.11	9.00	2.94
MGC2574	7.97	0.72	7.93	4.45	11.07	13629	11.11	9.00	2.49
HMGCL	8.30	0.75	8.32	3.99	11.10	13629	11.11	9.00	2.78
TOMM40	8.07	0.73	8.04	4.17	11.01	13629	11.11	9.00	2.64
RAB5B	8.31	0.75	8.35	4.30	11.07	13629	11.11	9.00	2.58
KIAA0907	9.05	0.81	9.09	3.47	11.95	13629	11.11	9.00	3.44
POLR2I	9.22	0.83	9.26	3.00	13.34	13629	11.11	9.00	4.45
LOC339287	9.26	0.83	9.21	5.11	13.22	13629	11.11	9.00	2.59
LRRFIP2	7.31	0.66	7.23	5.06	10.14	13629	11.11	9.00	2.00
CEP2	6.75	0.61	6.80	3.83	9.42	13629	11.11	9.00	2.46
NOMO1	9.29	0.84	9.30	3.84	12.63	13629	11.10	9.01	3.29
ZNF291	6.49	0.58	6.41	3.93	9.61	13629	11.10	9.01	2.45
POFUT2	6.24	0.56	6.23	3.87	8.85	13629	11.10	9.01	2.29
SIRT7	7.63	0.69	7.60	3.17	10.19	13629	11.09	9.02	3.21
SFRS5	9.58	0.86	9.50	5.78	12.65	13629	11.09	9.02	2.19
CRADD	7.32	0.66	7.26	3.78	11.85	13629	11.09	9.02	3.14
CRK	7.95	0.72	8.04	4.05	10.24	13629	11.08	9.02	2.53
COX15	7.08	0.64	7.14	3.91	11.10	13629	11.08	9.03	2.84
PPP2R1B	6.73	0.61	6.72	4.39	10.06	13629	11.08	9.03	2.29
BNIP1	6.28	0.57	6.21	2.94	8.87	13629	11.08	9.03	3.01
ACP2	8.07	0.73	8.09	3.19	11.42	13629	11.08	9.03	3.58
IKBKG	7.97	0.72	8.03	1.91	10.86	13629	11.07	9.03	5.68
DHRS1	7.91	0.71	7.91	3.72	11.70	13629	11.07	9.03	3.14
EPRS	8.54	0.77	8.57	4.08	11.45	13629	11.07	9.03	2.81
TXNL2	7.97	0.72	7.93	5.61	10.28	13629	11.07	9.04	1.83
ABCD4	6.31	0.57	6.32	3.20	8.44	13629	11.07	9.04	2.64
STX10	7.92	0.72	7.90	2.98	11.49	13629	11.06	9.04	3.85
CENTD2	7.36	0.67	7.28	4.44	10.11	13629	11.06	9.04	2.28
LTA4H	9.93	0.90	9.87	4.37	13.73	13629	11.06	9.04	3.14
FBL	10.35	0.94	10.38	5.55	13.18	13629	11.06	9.04	2.38
C12orf10	7.89	0.71	7.91	3.28	13.43	13629	11.06	9.04	4.10
C9orf78	7.65	0.69	7.60	3.36	11.51	13629	11.06	9.05	3.42
RFX5	8.08	0.73	8.10	3.82	11.15	13629	11.05	9.05	2.92
PMS2	6.96	0.63	7.06	2.85	9.29	13629	11.05	9.05	3.26
BAG1	8.62	0.78	8.56	6.00	12.51	13629	11.04	9.05	2.08
GOLGA5	8.37	0.76	8.43	2.17	10.77	13629	11.04	9.05	4.96
PMS2L11	7.68	0.70	7.66	4.25	10.45	13629	11.04	9.06	2.46
PARP4	8.95	0.81	8.99	3.82	11.69	13629	11.04	9.06	3.06
RNF139	8.65	0.78	8.57	3.90	12.23	13629	11.04	9.06	3.14
ADIPOR1	9.09	0.82	9.09	4.98	13.20	13629	11.04	9.06	2.65
TRIM3	5.62	0.51	5.62	3.74	8.26	13629	11.03	9.06	2.21
FAM53C	8.61	0.78	8.59	5.04	11.60	13629	11.03	9.06	2.30
POLB	8.64	0.78	8.63	3.52	12.64	13629	11.03	9.07	3.59
UNC50	8.56	0.78	8.62	2.21	11.72	13629	11.03	9.07	5.32
MGC2744	7.11	0.65	7.12	3.55	10.10	13629	11.03	9.07	2.85
RFNG	7.27	0.66	7.26	2.88	10.01	13629	11.02	9.07	3.48
SLC25A17	6.64	0.60	6.68	4.07	11.27	13629	11.02	9.07	2.77
ITGB4BP	9.25	0.84	9.27	6.06	12.56	13629	11.02	9.08	2.07
PPFIA1	6.99	0.63	7.04	4.60	10.94	13629	11.02	9.08	2.38
OCRL	7.17	0.65	7.21	3.23	9.94	13629	11.02	9.08	3.08
PME-1	8.44	0.77	8.44	3.98	12.26	13629	11.02	9.08	3.08
YIF1A	8.71	0.79	8.76	2.91	11.92	13629	11.01	9.08	4.10
ATP5G2	9.48	0.86	9.59	4.98	11.67	13629	11.01	9.08	2.34
LOC401499	7.85	0.71	7.88	3.00	10.60	13629	11.01	9.08	3.53
ARL2BP	7.60	0.69	7.58	3.35	10.15	13629	11.01	9.08	3.03
DENR	9.21	0.84	9.27	3.43	12.80	13629	11.01	9.08	3.74
BCL2L13	7.87	0.71	7.89	2.81	11.40	13629	11.01	9.09	4.05
PCOLN3	7.99	0.73	8.00	3.75	10.82	13629	11.01	9.09	2.88
UFD1L	8.96	0.81	9.04	2.78	12.47	13629	11.00	9.09	4.49
SMARCE1	8.31	0.76	8.34	5.13	12.30	13629	11.00	9.09	2.40
CLK3	7.71	0.70	7.63	3.20	10.75	13629	11.00	9.09	3.35
SCP2	8.89	0.81	9.00	5.09	11.35	13629	11.00	9.09	2.23
THOC2	7.95	0.72	7.93	3.67	10.79	13629	11.00	9.09	2.94
MGC2963	8.36	0.76	8.32	2.44	10.90	13629	11.00	9.09	4.47
RAP1A	9.22	0.84	9.25	5.28	12.18	13629	11.00	9.09	2.31
FLJ10815	6.49	0.59	6.51	3.08	8.83	13629	11.00	9.09	2.86
FRG1	7.88	0.72	7.87	2.04	11.59	13629	10.99	9.10	5.69
ACTR2	9.63	0.88	9.72	4.58	12.10	13629	10.99	9.10	2.64
UBE2G2	7.64	0.70	7.62	2.70	10.35	13629	10.99	9.10	3.83
CRK7	6.79	0.62	6.79	2.74	11.20	13629	10.98	9.10	4.08
GTF2H1	7.62	0.69	7.66	4.00	11.38	13629	10.98	9.11	2.85
SLC35B1	8.83	0.80	8.79	4.50	12.30	13629	10.98	9.11	2.73
SFRS10	9.45	0.86	9.55	5.94	12.49	13629	10.98	9.11	2.10
MECP2	6.70	0.61	6.72	3.81	9.66	13629	10.98	9.11	2.54
BIN3	7.78	0.71	7.74	3.85	10.62	13629	10.97	9.11	2.76
OPA1	7.32	0.67	7.29	4.04	9.73	13629	10.97	9.11	2.41
POLR1D	9.48	0.86	9.51	4.69	12.94	13629	10.97	9.12	2.76
FOXJ3	7.78	0.71	7.75	4.84	11.77	13629	10.97	9.12	2.43
GRLF1	6.15	0.56	6.11	3.45	8.80	13629	10.96	9.12	2.55
EEF1D	10.20	0.93	10.34	7.32	13.07	13629	10.96	9.12	1.78
TALDO1	10.26	0.94	10.20	3.98	13.37	13629	10.96	9.13	3.36
GC20	9.72	0.89	9.67	5.99	12.41	13629	10.96	9.13	2.07
NIPSNAP1	8.43	0.77	8.48	4.03	11.23	13629	10.95	9.13	2.79
ACOT8	7.16	0.65	7.19	2.83	9.98	13629	10.95	9.13	3.53
SUMO1	8.86	0.81	9.03	5.44	11.29	13629	10.95	9.13	2.08
RW1	8.41	0.77	8.43	2.29	11.15	13629	10.95	9.13	4.88
CSNK1G2	7.83	0.71	7.72	5.39	12.78	13629	10.95	9.13	2.37
KIAA0317	7.70	0.70	7.74	2.93	10.08	13629	10.95	9.13	3.45
M6PR	8.57	0.78	8.58	3.50	11.33	13629	10.95	9.13	3.24
RABGAP1	8.08	0.74	8.08	4.16	11.25	13629	10.95	9.14	2.70
NAG	7.85	0.72	7.90	2.41	12.34	13629	10.94	9.14	5.13
MYBBP1A	7.37	0.67	7.35	3.07	10.31	13629	10.94	9.14	3.36
GCN5L2	7.96	0.73	7.98	3.80	10.89	13629	10.94	9.14	2.86
DHRS4	7.94	0.73	7.99	3.57	10.93	13629	10.94	9.14	3.06
MED8	6.85	0.63	6.92	3.11	9.21	13629	10.94	9.14	2.96
MNAB	6.96	0.64	7.05	2.81	10.04	13629	10.94	9.14	3.58
CSNK2A2	7.55	0.69	7.47	2.91	11.74	13629	10.93	9.15	4.04
SFRS12	8.80	0.81	8.86	2.23	11.57	13629	10.93	9.15	5.20
PSME2	10.12	0.93	10.20	6.26	13.16	13629	10.93	9.15	2.10
TMEM4	8.79	0.80	8.89	4.44	11.20	13629	10.93	9.15	2.53
NUP107	8.74	0.80	8.74	4.36	13.28	13629	10.92	9.16	3.05
CCNC	9.40	0.86	9.51	4.50	12.42	13629	10.92	9.16	2.76
CD164	9.63	0.88	9.72	5.13	12.38	13629	10.92	9.16	2.42
ABCF3	7.49	0.69	7.53	3.08	10.84	13629	10.92	9.16	3.52
LOC112869	7.14	0.65	7.17	4.01	9.56	13629	10.91	9.16	2.38
PLA2G6	7.26	0.67	7.25	3.29	10.59	13629	10.91	9.16	3.22
RABEP2	7.22	0.66	7.18	2.98	10.79	13629	10.91	9.16	3.62
IIP45	7.71	0.71	7.73	4.61	10.87	13629	10.91	9.17	2.36
NDUFS4	9.01	0.83	9.06	3.26	11.97	13629	10.91	9.17	3.67
C20orf11	8.63	0.79	8.66	3.78	12.19	13629	10.90	9.17	3.22
PHF22	7.45	0.68	7.47	2.38	10.11	13629	10.90	9.17	4.25
DMTF1	8.19	0.75	8.21	3.08	12.10	13629	10.90	9.17	3.93
DULLARD	8.80	0.81	8.80	4.69	11.60	13629	10.90	9.17	2.47
RNF126	7.15	0.66	7.16	3.94	9.83	13629	10.90	9.17	2.50
VPS4B	8.92	0.82	8.96	3.18	12.01	13629	10.90	9.17	3.78
SRPK2	7.36	0.68	7.27	3.22	10.39	13629	10.90	9.18	3.22
TTC4	7.17	0.66	7.18	3.72	11.88	13629	10.90	9.18	3.19
ASCC1	7.31	0.67	7.30	3.20	9.75	13629	10.89	9.18	3.04
HIGD1A	9.90	0.91	9.96	5.85	13.16	13629	10.89	9.18	2.25
SEPHS1	7.61	0.70	7.55	4.47	11.35	13629	10.89	9.19	2.54
C14orf169	8.03	0.74	8.05	3.12	10.95	13629	10.88	9.19	3.51
RAB11FIP3	6.72	0.62	6.75	3.25	9.96	13629	10.88	9.19	3.07
SIRT3	7.33	0.67	7.29	1.95	10.28	13629	10.88	9.19	5.27
GTF2E1	7.48	0.69	7.51	2.32	10.71	13629	10.88	9.19	4.61
TRAFD1	7.24	0.67	7.16	4.66	10.56	13629	10.88	9.19	2.27
HEXB	9.85	0.91	9.95	4.87	13.47	13629	10.88	9.19	2.77
NUP98	7.18	0.66	7.20	4.32	9.78	13629	10.88	9.19	2.26
HSPC135	8.04	0.74	8.02	2.79	12.01	13629	10.87	9.20	4.31
KIAA1193	6.17	0.57	6.13	3.40	9.07	13629	10.87	9.20	2.67
ZNF692	7.63	0.70	7.59	3.93	10.82	13629	10.87	9.20	2.75
PIGF	7.85	0.72	7.92	3.31	11.61	13629	10.87	9.20	3.51
NBR1	8.34	0.77	8.43	2.60	10.30	13629	10.87	9.20	3.97
BAT1	9.60	0.88	9.74	3.79	12.29	13629	10.87	9.20	3.24
BLCAP	9.45	0.87	9.38	5.80	13.61	13629	10.86	9.20	2.35
SDFR1	10.49	0.97	10.59	3.15	14.03	13629	10.86	9.21	4.45
KIAA1219	6.62	0.61	6.64	2.68	10.04	13629	10.85	9.22	3.75
SNRP70	8.37	0.77	8.37	4.30	11.58	13629	10.85	9.22	2.69
PRPSAP2	7.86	0.72	7.83	2.83	11.51	13629	10.85	9.22	4.06
DLD	9.46	0.87	9.50	3.80	12.50	13629	10.85	9.22	3.29
PRO1855	9.71	0.90	9.76	5.90	12.96	13629	10.84	9.22	2.20
CCDC28A	8.20	0.76	8.20	3.26	12.08	13629	10.84	9.22	3.70
DVL2	6.93	0.64	6.96	2.81	10.37	13629	10.84	9.23	3.69
ZNF202	6.10	0.56	6.09	2.44	8.74	13629	10.83	9.23	3.58
PAF1	7.34	0.68	7.33	2.87	11.83	13629	10.83	9.23	4.13
ANKMY2	8.46	0.78	8.50	3.05	11.21	13629	10.83	9.23	3.67
C1orf164	8.03	0.74	8.05	3.77	10.64	13629	10.83	9.23	2.82
WDR1	8.97	0.83	9.06	5.91	11.31	13629	10.83	9.23	1.91
BCORL1	7.36	0.68	7.33	4.19	12.19	13629	10.83	9.23	2.91
SNX15	7.43	0.69	7.37	3.00	11.70	13629	10.83	9.24	3.90
TNFRSF6B	6.68	0.62	6.70	2.79	10.70	13629	10.83	9.24	3.83
VAPB	7.44	0.69	7.40	4.82	10.52	13629	10.82	9.24	2.18
PABPC4	9.74	0.90	9.73	4.31	13.56	13629	10.82	9.24	3.15
RBM6	8.11	0.75	8.10	4.83	11.08	13629	10.82	9.24	2.29
TRIP11	6.17	0.57	6.17	2.54	9.55	13629	10.82	9.24	3.77
ACVR1B	6.57	0.61	6.54	4.48	9.35	13629	10.82	9.24	2.09
DNAJB1	8.95	0.83	8.88	5.21	13.73	13629	10.82	9.24	2.64
ZNF79	5.76	0.53	5.80	3.09	8.45	13629	10.82	9.24	2.74
ZNF473	6.33	0.59	6.33	3.20	9.45	13629	10.82	9.24	2.95
PRKAB1	7.16	0.66	7.15	1.72	10.37	13629	10.82	9.25	6.02
HNRPAB	10.40	0.96	10.51	4.65	13.31	13629	10.82	9.25	2.86
ARHGEF2	8.46	0.78	8.46	4.67	11.35	13629	10.81	9.25	2.43
KIAA0831	7.64	0.71	7.57	2.77	11.02	13629	10.81	9.25	3.98
KIAA0826	8.16	0.76	8.20	4.53	11.29	13629	10.81	9.25	2.49
GALT	7.17	0.66	7.17	2.81	10.33	13629	10.81	9.25	3.68
KIAA0841	6.95	0.64	6.93	4.63	11.00	13629	10.81	9.25	2.38
DFFA	7.74	0.72	7.74	3.00	10.72	13629	10.81	9.25	3.57
FXR1	8.85	0.82	8.82	5.26	13.01	13629	10.80	9.26	2.47
SEC24B	8.53	0.79	8.66	3.86	11.29	13629	10.80	9.26	2.93
CIRBP	10.05	0.93	10.11	5.87	13.47	13629	10.80	9.26	2.29
NCSTN	8.40	0.78	8.43	3.45	11.43	13629	10.80	9.26	3.32
WWOX	6.91	0.64	6.92	3.17	9.95	13629	10.79	9.26	3.14
ZFR	7.88	0.73	7.99	5.04	10.69	13629	10.79	9.27	2.12
TXNL4B	7.46	0.69	7.45	2.77	10.37	13629	10.79	9.27	3.74
AK2	7.80	0.72	7.74	5.56	12.14	13629	10.79	9.27	2.18
CGRRF1	7.21	0.67	7.23	2.28	9.99	13629	10.78	9.27	4.39
Magmas	7.61	0.71	7.55	3.04	11.34	13629	10.78	9.28	3.73
PHKB	7.75	0.72	7.75	4.34	10.49	13629	10.78	9.28	2.42
YIPF1	7.76	0.72	7.75	3.13	10.54	13629	10.78	9.28	3.37
THAP11	7.67	0.71	7.65	2.72	10.63	13629	10.78	9.28	3.90
FBXO46	7.37	0.68	7.32	2.89	10.31	13629	10.78	9.28	3.57
GTF2B	8.48	0.79	8.48	2.81	11.84	13629	10.77	9.28	4.21
TAOK2	6.31	0.59	6.33	3.71	9.25	13629	10.77	9.28	2.49
COG5	7.65	0.71	7.66	2.49	10.83	13629	10.77	9.29	4.36
RQCD1	7.04	0.65	7.08	3.87	10.35	13629	10.77	9.29	2.68
TNFAIP1	7.64	0.71	7.65	3.90	10.63	13629	10.77	9.29	2.73
TFIP11	6.80	0.63	6.82	3.08	10.75	13629	10.77	9.29	3.49
KIAA0446	7.63	0.71	7.57	4.06	11.20	13629	10.77	9.29	2.76
FLJ20323	7.31	0.68	7.29	4.77	11.35	13629	10.77	9.29	2.38
ZNF259	7.12	0.66	7.15	3.84	9.82	13629	10.76	9.29	2.55
SEC61G	9.89	0.92	9.96	4.24	13.66	13629	10.76	9.29	3.22
ACBD3	8.13	0.76	8.16	5.01	11.15	13629	10.76	9.30	2.23
BBS1	7.80	0.73	7.74	2.82	11.12	13629	10.75	9.30	3.95
DIAPH1	7.89	0.73	7.90	5.02	10.84	13629	10.75	9.30	2.16
MAD2L1BP	7.61	0.71	7.60	3.26	10.91	13629	10.75	9.31	3.34
RABGEF1	7.95	0.74	7.97	4.06	11.07	13629	10.74	9.31	2.72
USP21	7.60	0.71	7.63	2.81	11.14	13629	10.74	9.31	3.96
EFHA1	8.96	0.83	9.06	2.54	12.01	13629	10.74	9.31	4.73
NIBP	7.12	0.66	7.17	4.11	9.58	13629	10.73	9.32	2.33
WDR12	8.54	0.80	8.54	3.38	10.98	13629	10.73	9.32	3.25
ARHGEF11	6.76	0.63	6.82	2.98	9.90	13629	10.73	9.32	3.32
ELMO2	7.18	0.67	7.22	2.87	10.12	13629	10.73	9.32	3.53
TGFBRAP1	7.03	0.66	7.01	2.56	10.58	13629	10.73	9.32	4.13
ZNF274	8.12	0.76	8.18	2.66	11.16	13629	10.73	9.32	4.20
ATG5	7.45	0.69	7.50	4.40	11.08	13629	10.72	9.32	2.52
PTCD1	7.38	0.69	7.36	2.70	10.96	13629	10.72	9.33	4.06
SYPL1	9.16	0.85	9.28	4.17	11.91	13629	10.72	9.33	2.86
PRPF4B	7.93	0.74	8.03	2.94	10.31	13629	10.71	9.33	3.50
C14orf114	7.39	0.69	7.40	3.05	9.93	13629	10.71	9.33	3.25
SPTLC1	8.48	0.79	8.61	4.34	10.96	13629	10.71	9.34	2.53
PRDX3	8.82	0.82	8.89	5.14	11.11	13629	10.71	9.34	2.16
C1orf123	8.12	0.76	8.19	3.55	10.59	13629	10.71	9.34	2.98
SF3B4	8.63	0.81	8.67	2.81	11.39	13629	10.70	9.34	4.06
SLC11A2	7.24	0.68	7.22	4.37	11.07	13629	10.70	9.34	2.54
RHOT1	8.25	0.77	8.28	4.81	11.78	13629	10.70	9.34	2.45
ANAPC1	7.63	0.71	7.61	2.94	10.25	13629	10.70	9.34	3.48
DRIM	7.14	0.67	7.16	2.26	9.70	13629	10.70	9.34	4.28
CAPZA2	9.01	0.84	9.08	3.54	12.11	13629	10.70	9.35	3.43
C16orf35	7.07	0.66	7.07	4.25	11.67	13629	10.69	9.35	2.75
FLJ20436	8.05	0.75	8.01	2.27	11.60	13629	10.69	9.35	5.11
HSPC176	8.52	0.80	8.57	3.72	11.29	13629	10.69	9.35	3.03
PTPN9	7.56	0.71	7.56	2.66	10.25	13629	10.69	9.35	3.86
FLJ41131	7.38	0.69	7.33	2.58	11.03	13629	10.69	9.36	4.27
KAT3	8.10	0.76	8.20	2.82	10.28	13629	10.69	9.36	3.65
FOXK2	7.78	0.73	7.76	3.23	11.80	13629	10.68	9.36	3.66
CHMP2B	7.99	0.75	8.06	3.50	12.96	13629	10.68	9.36	3.71
REPIN1	9.12	0.85	9.16	3.26	12.82	13629	10.68	9.36	3.93
ACVR2A	7.43	0.70	7.39	2.79	11.68	13629	10.68	9.36	4.18
AP2B1	8.48	0.79	8.54	3.93	11.67	13629	10.68	9.37	2.97
LSM3	9.17	0.86	9.23	2.91	12.29	13629	10.68	9.37	4.23
EST1B	6.91	0.65	6.96	3.85	9.64	13629	10.67	9.37	2.50
ILKAP	7.43	0.70	7.41	2.81	10.23	13629	10.67	9.37	3.65
UXS1	7.94	0.74	7.94	2.79	11.49	13629	10.67	9.37	4.13
WDR10	7.00	0.66	7.01	3.16	10.85	13629	10.67	9.37	3.43
TMEM14B	9.32	0.87	9.40	3.70	13.20	13629	10.67	9.38	3.57
TPR	8.49	0.80	8.59	4.73	11.14	13629	10.67	9.38	2.36
PHF10	8.52	0.80	8.57	3.72	11.01	13629	10.66	9.38	2.96
UBE2I	8.12	0.76	8.16	5.33	10.61	13629	10.66	9.38	1.99
SCLY	6.31	0.59	6.31	3.34	8.98	13629	10.66	9.38	2.69
ZFP95	6.28	0.59	6.32	3.12	8.70	13629	10.66	9.38	2.79
DC12	8.16	0.77	8.10	2.74	12.31	13629	10.66	9.38	4.49
CIB1	9.00	0.84	9.03	5.07	13.90	13629	10.66	9.38	2.74
ELF2	7.37	0.69	7.34	3.81	10.58	13629	10.66	9.38	2.78
RPA1	8.67	0.81	8.66	2.93	11.42	13629	10.66	9.38	3.90
BAG5	8.00	0.75	8.10	3.02	10.29	13629	10.66	9.39	3.41
LOC401255	8.93	0.84	8.85	3.97	12.40	13629	10.66	9.39	3.12
EIF1AX	8.68	0.82	8.77	4.84	11.34	13629	10.65	9.39	2.34
NUDC	8.43	0.79	8.47	5.49	10.74	13629	10.65	9.39	1.96
CHP	8.56	0.80	8.61	4.87	11.23	13629	10.65	9.39	2.30
KIAA0152	8.89	0.84	8.87	3.87	11.54	13629	10.64	9.39	2.99
SEPHS2	8.83	0.83	8.79	5.13	12.28	13629	10.64	9.40	2.40
GRB2	8.29	0.78	8.25	3.92	11.38	13629	10.64	9.40	2.91
MED9	6.85	0.64	6.91	2.87	9.40	13629	10.63	9.41	3.28
FAM20B	7.45	0.70	7.47	3.09	10.13	13629	10.63	9.41	3.28
C2orf24	7.39	0.70	7.33	2.46	11.26	13629	10.63	9.41	4.59
MTX1	8.66	0.82	8.74	2.91	11.84	13629	10.63	9.41	4.07
MGC3123	6.99	0.66	7.02	3.46	10.72	13629	10.63	9.41	3.10
PSEN1	7.85	0.74	7.88	3.26	10.72	13629	10.63	9.41	3.29
MLL	6.76	0.64	6.74	4.10	10.23	13629	10.62	9.41	2.49
RAE1	8.65	0.81	8.61	5.06	12.34	13629	10.62	9.41	2.44
GMFB	8.58	0.81	8.61	4.80	11.37	13629	10.62	9.41	2.37
AKAP8L	6.41	0.60	6.39	3.26	9.90	13629	10.62	9.42	3.03
SEMA4F	6.68	0.63	6.74	3.08	9.40	13629	10.62	9.42	3.05
HDLBP	9.27	0.87	9.39	5.22	12.82	13629	10.61	9.42	2.46
C2orf4	8.56	0.81	8.67	2.85	12.05	13629	10.61	9.42	4.23
CUTL1	7.93	0.75	7.89	4.58	11.79	13629	10.61	9.42	2.57
CEP350	8.37	0.79	8.40	2.91	12.38	13629	10.61	9.42	4.26
PIGC	7.05	0.66	7.10	4.02	9.59	13629	10.61	9.42	2.39
CSTB	10.73	1.01	10.76	3.05	14.03	13629	10.61	9.43	4.59
KIAA0226	7.44	0.70	7.34	3.25	10.97	13629	10.61	9.43	3.38
GPI	10.22	0.96	10.29	4.15	13.04	13629	10.61	9.43	3.14
STX6	7.08	0.67	7.13	4.39	9.40	13629	10.61	9.43	2.14
SNRPA	8.93	0.84	8.94	3.45	11.64	13629	10.60	9.43	3.38
RBBP6	7.77	0.73	7.76	3.92	11.69	13629	10.60	9.43	2.98
TMEM11	7.67	0.72	7.63	3.85	10.69	13629	10.60	9.43	2.78
WDTC1	7.69	0.73	7.69	3.29	10.90	13629	10.60	9.43	3.31
PL6	7.08	0.67	7.16	2.94	9.22	13629	10.60	9.44	3.13
ATRN	7.03	0.66	7.11	3.52	9.83	13629	10.60	9.44	2.79
SND1	9.12	0.86	9.05	2.91	12.43	13629	10.60	9.44	4.28
MYO9B	7.10	0.67	7.06	4.71	10.18	13629	10.60	9.44	2.16
RBM12B	6.11	0.58	6.11	3.08	8.35	13629	10.59	9.44	2.71
ROCK2	7.51	0.71	7.44	2.70	9.99	13629	10.59	9.44	3.70
MRPL28	7.90	0.75	7.94	2.81	11.60	13629	10.59	9.44	4.13
FLJ20297	8.00	0.76	7.99	3.22	10.95	13629	10.59	9.45	3.40
HGS	8.85	0.84	8.90	2.17	11.85	13629	10.58	9.45	5.46
F8A1	8.99	0.85	9.05	2.79	11.79	13629	10.58	9.45	4.22
BAT2D1	8.39	0.79	8.46	5.51	11.65	13629	10.58	9.45	2.11
SEC63	8.03	0.76	8.08	4.96	11.48	13629	10.58	9.45	2.32
PANK2	8.44	0.80	8.43	5.24	11.65	13629	10.58	9.45	2.22
WDR74	7.20	0.68	7.17	4.43	10.46	13629	10.58	9.45	2.36
PRPS1	8.29	0.78	8.26	4.44	12.18	13629	10.58	9.45	2.74
FLJ21415	7.54	0.71	7.51	3.34	10.86	13629	10.58	9.45	3.25
AP2M1	9.94	0.94	10.08	2.77	12.84	13629	10.58	9.46	4.64
ADCY3	7.14	0.67	7.15	4.14	10.01	13629	10.58	9.46	2.42
BRD4	8.23	0.78	8.21	4.36	12.17	13629	10.57	9.46	2.79
TOR1AIP1	8.06	0.76	8.10	4.65	10.72	13629	10.57	9.46	2.30
SLC35A2	6.77	0.64	6.83	4.28	10.25	13629	10.57	9.46	2.40
PRAF1	7.40	0.70	7.36	2.79	10.21	13629	10.57	9.46	3.66
KIAA0265	7.80	0.74	7.77	4.39	11.54	13629	10.56	9.47	2.63
KLHL22	5.75	0.54	5.77	3.61	8.59	13629	10.56	9.47	2.38
PXMP4	7.85	0.74	7.89	3.45	11.49	13629	10.56	9.47	3.33
B4GALT3	8.16	0.77	8.08	4.08	12.17	13629	10.56	9.47	2.98
C19orf22	9.32	0.88	9.29	5.92	13.12	13629	10.55	9.48	2.22
FLJ20422	8.02	0.76	7.97	4.18	10.60	13629	10.55	9.48	2.54
MGRN1	8.27	0.78	8.27	2.68	11.47	13629	10.55	9.48	4.28
CAPNS1	10.56	1.00	10.71	3.02	13.04	13629	10.55	9.48	4.32
COX10	8.06	0.76	8.07	3.64	11.11	13629	10.55	9.48	3.05
TPMT	7.14	0.68	7.11	4.03	11.06	13629	10.55	9.48	2.74
M11S1	9.61	0.91	9.72	5.32	12.99	13629	10.55	9.48	2.44
RABEPK	7.69	0.73	7.66	2.58	10.63	13629	10.55	9.48	4.11
PDPK1	7.08	0.67	7.05	3.94	10.75	13629	10.55	9.48	2.72
SLC35E1	8.43	0.80	8.33	5.89	12.86	13629	10.55	9.48	2.18
DKFZp761I2123	7.67	0.73	7.60	4.57	12.18	13629	10.54	9.48	2.67
RUTBC1	7.95	0.75	7.92	5.53	12.08	13629	10.54	9.48	2.19
MKRN2	6.62	0.63	6.70	2.43	9.02	13629	10.54	9.48	3.71
UBE2NL	8.27	0.78	8.27	4.12	11.44	13629	10.54	9.49	2.78
RPP21	7.91	0.75	7.98	2.85	11.65	13629	10.54	9.49	4.09
RNF13	8.95	0.85	8.99	4.81	11.93	13629	10.54	9.49	2.48
C9orf6	7.68	0.73	7.68	2.77	10.53	13629	10.54	9.49	3.80
SNX11	7.50	0.71	7.38	4.80	10.44	13629	10.54	9.49	2.17
C15orf15	9.53	0.90	9.60	2.91	12.60	13629	10.54	9.49	4.34
NUP214	7.92	0.75	7.87	2.20	11.34	13629	10.54	9.49	5.15
SF3B2	9.06	0.86	9.14	3.49	11.88	13629	10.54	9.49	3.41
ENY2	9.29	0.88	9.34	2.66	12.79	13629	10.53	9.49	4.82
PTBP1	9.80	0.93	9.96	5.35	11.82	13629	10.53	9.49	2.21
HNRPA1	10.64	1.01	10.90	7.40	12.87	13629	10.53	9.50	1.74
SH2B	7.04	0.67	7.01	3.93	9.69	13629	10.53	9.50	2.47
PRPF31	7.11	0.68	7.16	4.03	9.88	13629	10.53	9.50	2.45
CDC40	7.55	0.72	7.60	3.97	10.21	13629	10.53	9.50	2.57
SH2BP1	8.52	0.81	8.62	3.16	11.21	13629	10.52	9.50	3.55
DDX50	8.74	0.83	8.81	2.45	11.08	13629	10.52	9.50	4.52
TIAL1	7.52	0.72	7.57	4.74	10.13	13629	10.51	9.51	2.13
PLCG1	7.28	0.69	7.29	2.82	10.46	13629	10.51	9.51	3.71
TOP3A	6.05	0.58	6.05	3.29	8.30	13629	10.51	9.51	2.52
RYBP	8.66	0.82	8.66	5.55	12.30	13629	10.51	9.52	2.22
PSMF1	8.17	0.78	8.24	1.96	11.84	13629	10.50	9.52	6.03
RAB9A	8.47	0.81	8.50	2.89	11.77	13629	10.50	9.52	4.08
PARP16	7.26	0.69	7.24	2.58	9.83	13629	10.50	9.52	3.81
FLJ22709	7.04	0.67	7.07	2.78	10.49	13629	10.50	9.53	3.77
ITCH	6.86	0.65	6.86	3.94	9.68	13629	10.50	9.53	2.46
ZMYND11	8.78	0.84	8.85	4.26	11.07	13629	10.49	9.53	2.60
DNAJC4	6.57	0.63	6.49	4.58	9.44	13629	10.49	9.53	2.06
NCKIPSD	6.44	0.61	6.44	3.41	9.03	13629	10.49	9.53	2.65
RALB	8.08	0.77	8.09	3.60	11.42	13629	10.49	9.53	3.18
EIF2B3	7.91	0.75	7.90	3.85	11.22	13629	10.49	9.53	2.92
MGC5139	8.05	0.77	8.09	2.79	10.91	13629	10.49	9.53	3.92
RCL1	7.48	0.71	7.50	2.76	11.74	13629	10.49	9.53	4.25
MGC5508	8.75	0.83	8.82	3.77	11.65	13629	10.49	9.54	3.09
ELP4	7.13	0.68	7.18	2.23	10.40	13629	10.49	9.54	4.66
FRAP1	5.82	0.55	5.85	2.61	8.54	13629	10.48	9.54	3.27
SAFB	6.91	0.66	6.95	4.00	9.77	13629	10.48	9.54	2.44
TAF6L	5.60	0.53	5.64	2.86	7.79	13629	10.48	9.54	2.72
DDX54	7.33	0.70	7.30	2.81	10.82	13629	10.48	9.54	3.85
C16orf51	7.14	0.68	7.18	2.42	9.64	13629	10.48	9.54	3.98
NF1	6.11	0.58	6.17	4.19	8.39	13629	10.47	9.55	2.00
ME2	8.26	0.79	8.27	4.41	11.98	13629	10.47	9.55	2.72
NOL5A	8.50	0.81	8.41	5.76	12.15	13629	10.47	9.55	2.11
SLC25A11	8.17	0.78	8.12	4.22	11.54	13629	10.47	9.55	2.73
BRMS1	8.02	0.77	8.05	2.89	10.99	13629	10.47	9.55	3.81
AHCYL1	8.73	0.83	8.75	5.13	12.68	13629	10.47	9.55	2.47
FAHD2A	6.97	0.67	7.05	3.15	9.89	13629	10.47	9.55	3.14
UIP1	7.06	0.67	7.10	2.28	10.70	13629	10.47	9.55	4.69
SNAP29	7.68	0.73	7.70	3.37	11.56	13629	10.47	9.55	3.44
CECR7	7.83	0.75	7.78	3.43	11.28	13629	10.47	9.55	3.28
MCCC1	7.98	0.76	7.97	3.66	11.51	13629	10.47	9.55	3.15
KIAA0999	7.15	0.68	7.10	4.42	9.78	13629	10.47	9.55	2.21
ABHD4	8.25	0.79	8.31	2.66	11.23	13629	10.47	9.55	4.23
DCTN1	7.50	0.72	7.42	3.94	10.63	13629	10.47	9.55	2.70
AGPAT1	8.84	0.85	8.96	3.68	11.57	13629	10.47	9.56	3.14
GNB2L1	11.03	1.05	11.38	6.64	12.89	13629	10.47	9.56	1.94
SFMBT1	6.90	0.66	6.93	3.20	10.66	13629	10.46	9.56	3.33
PPP2R5E	8.40	0.80	8.51	3.78	11.17	13629	10.46	9.56	2.95
NSUN5	8.57	0.82	8.64	3.66	11.38	13629	10.46	9.56	3.11
VRK2	7.82	0.75	7.86	2.56	11.93	13629	10.45	9.57	4.66
MRPL39	8.23	0.79	8.24	3.50	11.18	13629	10.45	9.57	3.20
TYK2	7.99	0.76	7.98	2.96	11.34	13629	10.45	9.57	3.83
SR140	7.98	0.76	8.06	3.51	10.57	13629	10.45	9.57	3.01
U2AF1	10.18	0.97	10.23	2.80	12.72	13629	10.45	9.57	4.54
DJ328E19.C1.1	9.44	0.90	9.49	4.89	12.38	13629	10.45	9.57	2.53
WDR55	6.71	0.64	6.78	3.54	9.13	13629	10.45	9.57	2.58
HSA9761	7.72	0.74	7.76	5.02	10.83	13629	10.45	9.57	2.16
USP10	7.94	0.76	7.93	4.50	10.58	13629	10.44	9.58	2.35
HLA-A	12.25	1.17	12.60	3.80	14.03	13629	10.44	9.58	3.69
PARP1	9.12	0.87	9.12	4.88	12.49	13629	10.44	9.58	2.56
ATP2A2	9.22	0.88	9.24	5.78	12.38	13629	10.44	9.58	2.14
ZNF606	6.70	0.64	6.72	2.72	10.24	13629	10.44	9.58	3.76
ABI2	7.04	0.67	7.08	2.96	10.10	13629	10.44	9.58	3.41
RAB35	7.18	0.69	7.20	3.09	9.77	13629	10.44	9.58	3.16
COX4NB	8.20	0.79	8.18	3.02	11.13	13629	10.43	9.59	3.69
TIMM23	8.12	0.78	8.14	4.06	10.43	13629	10.43	9.59	2.57
MSL3L1	7.22	0.69	7.15	5.04	10.19	13629	10.43	9.59	2.02
SFRS16	8.22	0.79	8.17	4.09	11.46	13629	10.43	9.59	2.80
DVL3	7.40	0.71	7.36	3.94	11.46	13629	10.42	9.59	2.91
PSMD8	9.40	0.90	9.46	2.77	13.34	13629	10.42	9.59	4.82
ATP6V0D1	9.70	0.93	9.80	2.85	12.35	13629	10.42	9.60	4.34
WHSC2	7.06	0.68	7.14	3.85	11.90	13629	10.42	9.60	3.09
PIAS1	7.57	0.73	7.52	4.94	10.26	13629	10.42	9.60	2.08
ATP5D	8.46	0.81	8.41	3.23	11.64	13629	10.42	9.60	3.61
TROVE2	8.22	0.79	8.29	5.25	11.26	13629	10.42	9.60	2.15
FAM3A	6.95	0.67	6.99	3.55	9.70	13629	10.42	9.60	2.73
MNT	7.90	0.76	7.88	2.32	12.08	13629	10.41	9.60	5.21
HBLD2	7.62	0.73	7.57	4.76	12.01	13629	10.41	9.60	2.53
KIAA0179	7.99	0.77	8.04	5.29	10.70	13629	10.41	9.60	2.02
MRPS18B	8.14	0.78	8.20	3.25	10.95	13629	10.41	9.61	3.37
ARS2	8.10	0.78	8.17	5.51	11.61	13629	10.41	9.61	2.11
UBE2B	8.22	0.79	8.20	3.77	11.53	13629	10.40	9.61	3.06
BRD1	7.63	0.73	7.53	4.23	11.20	13629	10.40	9.62	2.64
ZNF505	7.34	0.71	7.33	3.89	10.41	13629	10.40	9.62	2.68
COPS3	8.56	0.82	8.51	3.81	12.65	13629	10.40	9.62	3.32
PSMD12	7.91	0.76	7.90	4.52	10.55	13629	10.40	9.62	2.34
CTDSP1	8.71	0.84	8.74	4.27	11.31	13629	10.39	9.62	2.65
UVRAG	7.42	0.71	7.35	2.72	11.11	13629	10.39	9.63	4.08
ZNF629	7.78	0.75	7.80	3.51	10.59	13629	10.39	9.63	3.02
GTF3C4	7.12	0.69	7.14	2.42	9.81	13629	10.38	9.63	4.05
FLJ12788	7.34	0.71	7.36	2.54	9.75	13629	10.38	9.64	3.84
TRMT12	7.43	0.72	7.37	2.21	11.24	13629	10.38	9.64	5.10
HKE2	6.78	0.65	6.81	2.91	9.74	13629	10.38	9.64	3.35
TXNDC4	7.95	0.77	7.98	5.70	10.67	13629	10.38	9.64	1.87
RPL26L1	8.91	0.86	8.99	2.44	11.80	13629	10.37	9.64	4.84
TTC3	9.39	0.91	9.43	5.33	12.54	13629	10.37	9.64	2.36
CHMP1B	8.09	0.78	8.13	3.74	11.94	13629	10.37	9.64	3.19
TGDS	7.24	0.70	7.25	2.38	10.09	13629	10.37	9.64	4.23
PIAS4	6.02	0.58	6.00	3.00	8.56	13629	10.37	9.64	2.85
PRSS15	8.34	0.80	8.35	3.36	11.34	13629	10.37	9.64	3.37
COMT	8.50	0.82	8.47	4.54	12.08	13629	10.37	9.65	2.66
PACSIN2	9.60	0.93	9.66	5.72	13.22	13629	10.37	9.65	2.31
UPF2	7.85	0.76	7.88	2.46	11.67	13629	10.37	9.65	4.74
MTMR3	6.83	0.66	6.84	2.05	9.88	13629	10.37	9.65	4.81
PCM1	7.91	0.76	7.91	4.53	10.47	13629	10.36	9.65	2.31
PMS1	7.92	0.76	8.01	2.09	11.44	13629	10.36	9.65	5.47
PDCL3	8.09	0.78	8.21	2.62	12.28	13629	10.36	9.65	4.69
SAPS1	7.91	0.76	7.85	4.26	10.59	13629	10.36	9.65	2.49
VPS45A	6.89	0.67	6.96	2.54	9.43	13629	10.36	9.66	3.72
BANF1	9.86	0.95	9.98	3.36	12.64	13629	10.36	9.66	3.76
MRPL22	8.10	0.78	8.15	3.72	11.75	13629	10.36	9.66	3.16
CNNM3	7.55	0.73	7.52	2.96	11.36	13629	10.36	9.66	3.83
GSTK1	9.29	0.90	9.35	2.74	12.41	13629	10.35	9.66	4.52
WDR77	7.97	0.77	7.95	4.41	10.98	13629	10.35	9.66	2.49
[truncated: 11,038 more rows]
